# Supplementary material
Source: PubMed Central journal article supplement (PMC5724969)
Supplement: NIHMS898688-supplement-1.pdf [file NIHMS898688-supplement-1.pdf]

# Supplementary Information

## Continuous directed evolution of aminoacyl-tRNA synthetases

David I. Bryson<sup>1</sup>, Chenguang Fan<sup>2</sup>, Li-Tao Guo<sup>3</sup>, Corwin Miller<sup>3</sup>, Dieter Söll<sup>3,4</sup>, & David R. Liu<sup>1,5,6\*</sup>

<sup>1</sup> *Department of Chemistry and Chemical Biology, Harvard University, Cambridge, MA, 02138*

<sup>2</sup> *Department of Chemistry and Biochemistry, University of Arkansas, Fayetteville, AR, 72701*

<sup>3</sup> *Department of Molecular Biophysics and Biochemistry, Yale University, New Haven, CT, 06520*

<sup>4</sup> *Department of Chemistry, Yale University, New Haven, CT, 06520*

<sup>5</sup> *Howard Hughes Medical Institute, Harvard University, Cambridge, MA, 02138*

<sup>6</sup> *Broad Institute of Harvard and MIT, Cambridge, MA, 02142*

Supplementary Figure 1. Overview of orthogonal translation in biological systems.

Supplementary Figure 2. Host-cell plasmids used to implement PACE positive selections for aminoacylation.

Supplementary Figure 3. Optimization of the T7 RNAP-mediated PACE positive selection for aminoacylation.

Supplementary Figure 4. Non-continuous propagation of SP in positive selections designed for PACE.

Supplementary Figure 5. Positive selections for aminoacylation support activity-dependent, continuous propagation in PACE.

Supplementary Figure 6. Mutations emerging from PACE enhance the activity of PylRS variants on their target ncAA.

Supplementary Figure 7. ESI-MS analysis of purified sfGFP containing up to three BocK residues produced by chPylRS(IPYE).

Supplementary Figure 8. ESI-MS analysis of purified sfGFP containing an AcK residue at position 2 produced by chAcK3RS(IPYE) in the presence of 1 mM AcK.

Supplementary Figure 9. Characterization of split variants of chPylRS emerging from PACE.

Supplementary Figure 10. Characterization of the S326I mutation emerging from lagoon 2 during the Pyl-3 segment of PACE.

Supplementary Figure 11. Western blot analysis of full-length and split chPylRS variants from PACE.

Supplementary Figure 12. ESI-MS analysis of affinity-tagged Ni-NTA-purified chPylRS variants from PACE.

Supplementary Figure 13. Alignment of PylRS sequences from multiple organisms and from PACE variants.

Supplementary Figure 14. Overview of the PACE negative selection for AARS activity using the dominant-negative variant of pIII (pIII-neg).

Supplementary Figure 15. Validation of the PACE negative selection.

Supplementary Figure 16. The previously evolved AARS, *p*-NFRS, accepts multiple amino acid substrates.

Supplementary Figure 17. Dual-selection PACE of the polyspecific *Mj*TyrRS variant, *p*-NFRS, to evolve selective activity on *p*-IF.

Supplementary Figure 18. Non-continuous counterselections to isolate *p*-IF-selective evolved AARS variants after dual-selection PACE.

Supplementary Figure 19. The PACE-evolved Iodo.5 variant is highly selective for the desired substrate, *p*-IF.

Supplementary Table 1. Summary of mutations observed in PACE segment Pyl-1.

Supplementary Table 2. Summary of mutations observed in PACE segment Pyl-2.

Supplementary Table 3. Summary of mutations observed in lagoon 1 of PACE segment Pyl-3.

Supplementary Table 4. Summary of mutations observed in lagoon 2 of PACE segment Pyl-3.

Supplementary Table 5. Kinetic parameters of chPylRS variants using L-pyrrolysine substrate.

Supplementary Table 6. Kinetic parameters of the fusions of split chPylRS variants from PACE.

Supplementary Table 7. Kinetic parameters of *Mj*TyrRS variants containing mutations from PACE.

Supplementary Table 8. Plasmids used in this work.

Supplementary Note 1. DNA sequences of genes used in this study.

## Supplementary Results

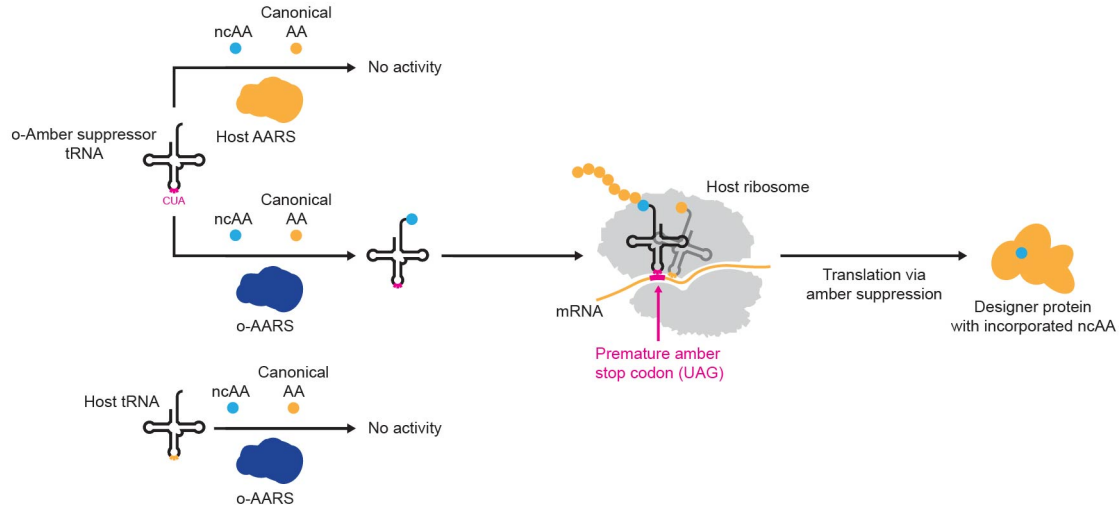

**Supplementary Figure 1.** Overview of orthogonal translation in biological systems. The orthogonal amber suppressor tRNA is not recognized by any of the cell's endogenous AARS enzymes, but is selectively aminoacylated by the orthogonal AARS with the desired ncAA. The charged amber suppressor tRNA decodes 'UAG' stop codons during translation of the protein of interest, enabling site-specific incorporation of the ncAA into proteins made by the cell.

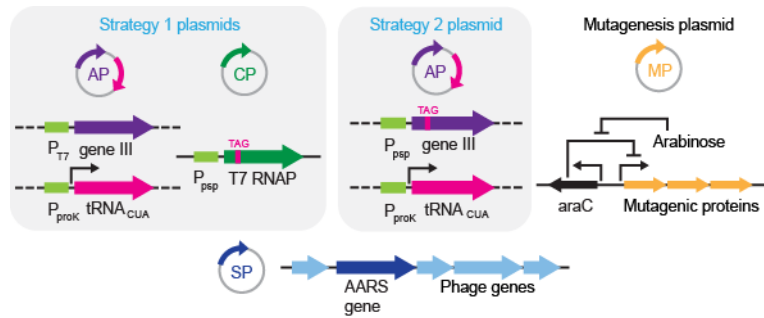

**Supplementary Figure 2.** Host-cell plasmids used to implement PACE positive selections for aminoacylation. The accessory plasmid (AP) in each selection strategy encodes the amber suppressor tRNA (constitutively expressed) and gene III (conditionally expressed). Strategy 1 also includes a complementary plasmid (CP) that encodes T7 RNAP. Both strategies implement a phage shock promoter (P<sub>psp</sub>), which prevents expression of the downstream gene until the host is infected with the selection phage. During PACE, mutagenic proteins encoded on the mutagenesis plasmid (MP) are induced in the presence of arabinose. The selection phage (SP) encodes all phage genes except gene III, which is replaced by the evolving AARS gene.

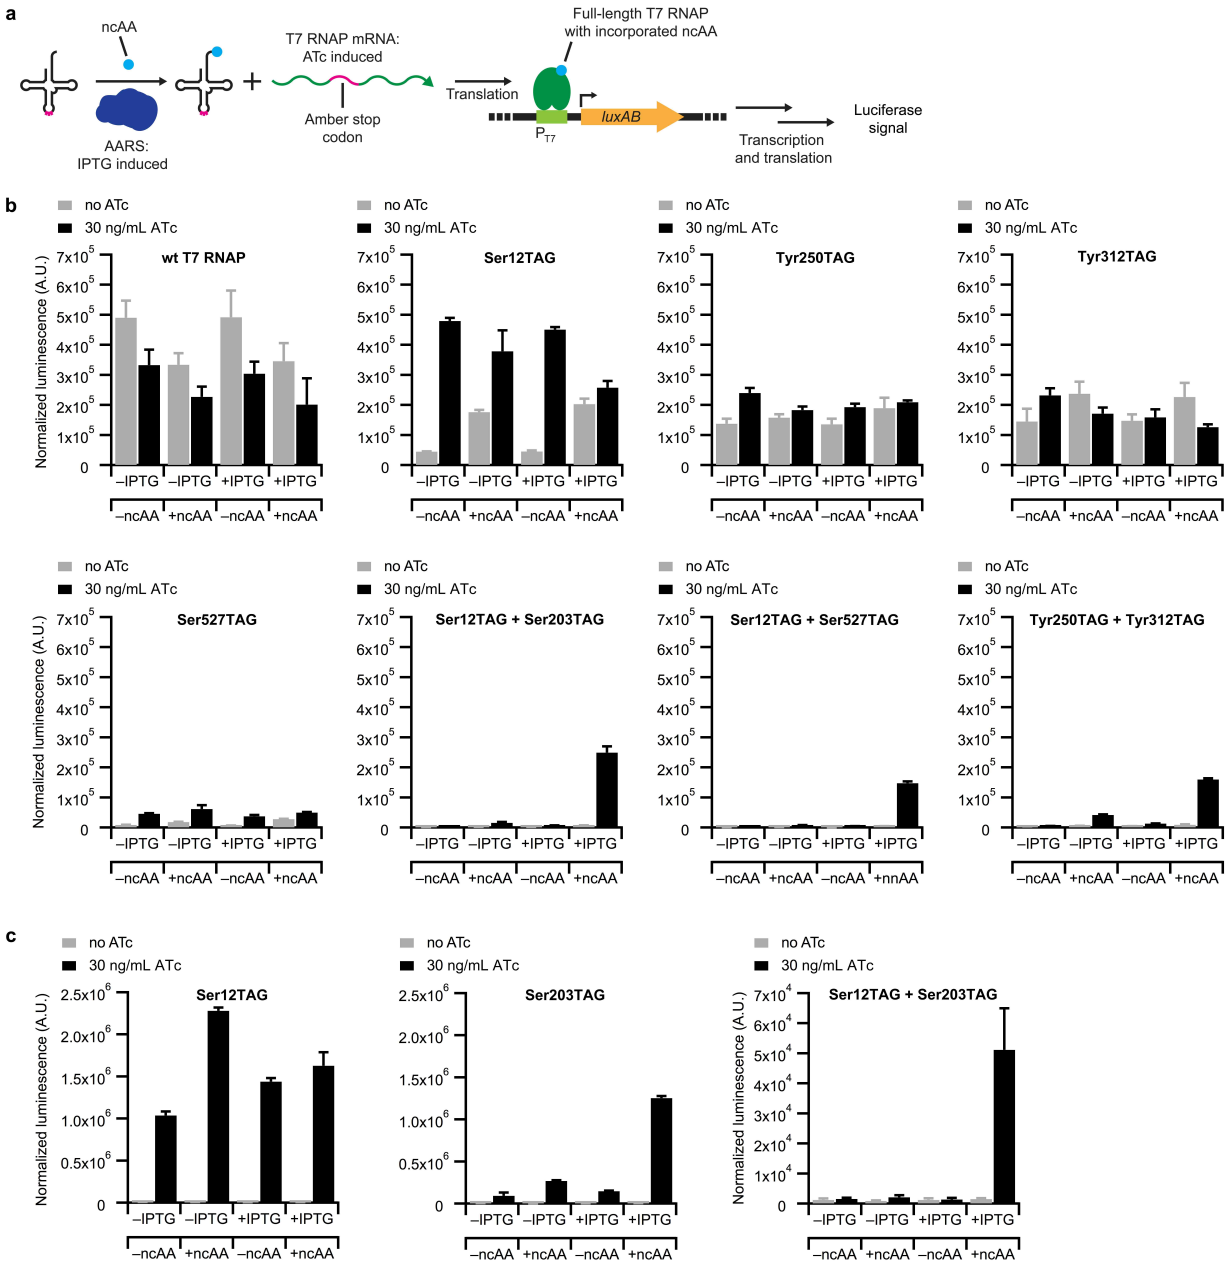

**Supplementary Figure 3.** Optimization of the T7 RNAP-mediated PACE positive selection for aminoacylation. Two amber stop codons in T7 RNAP are required to make reporter expression completely dependent on orthogonal translation of full-length T7 RNAP. **(a)** Luciferase reporter assay for optimizing the position and number of TAG stop codons in T7 RNAP. The orthogonal AARS (inducible with IPTG) charges the ncAA onto the amber suppressor tRNA, enabling translation of full-length T7 RNAP (inducible with anhydrotetracycline, ATc). Production of T7 RNAP results in subsequent expression of the luciferase reporter gene, *luxAB*. **(b)** Using *p*-NFRS to site-specifically incorporate *p*-NF at two positions (Ser12TAG + Ser203TAG) in T7 RNAP provided optimal reporter signal that was dependent on orthogonal AARS activity (+IPTG, +ncAA) and on expression of T7 RNAP (+ATc). **(c)** Using chPyIRS, reporter signal resulting from site-specific incorporation of Bock into T7 RNAP (Ser12TAG + Ser203TAG) suggests broad ncAA-tolerance at both sites of ncAA installation. Each value and error bar in **b** and **c** reflects the mean and s.d. of at least three independent biological replicates.

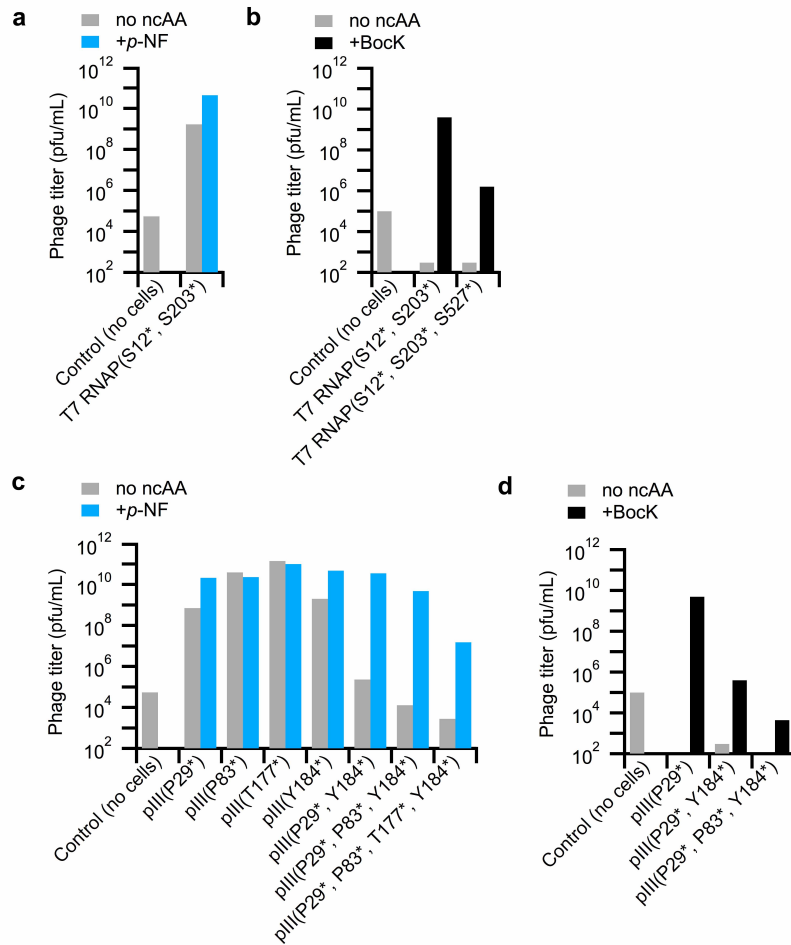

**Supplementary Figure 4.** Non-continuous propagation of SP in positive selections designed for PACE. To confirm activity dependence of phage propagation for each of the two positive selections (suppression of stop codons in T7 RNAP or in gene III), phage titers resulting from 16 h of propagation in batch culture were compared for SP expressing *p*-NFRS (**a**, **c**) or chPyIRS (**b**, **d**). In each experiment, equal amounts of SP encoding the AARS of interest were used to infect cultures of S1030 host cells harboring the required PACE AP and CP plasmids in the presence or absence of the ncAA. Controls representing the starting titers for each set of experiments were prepared by diluting the same amount of SP into media lacking cells. Results indicate that selection stringency increases as the number of stop codons is increased in T7 RNAP (**a**, **b**) or gIII (**c**, **d**).

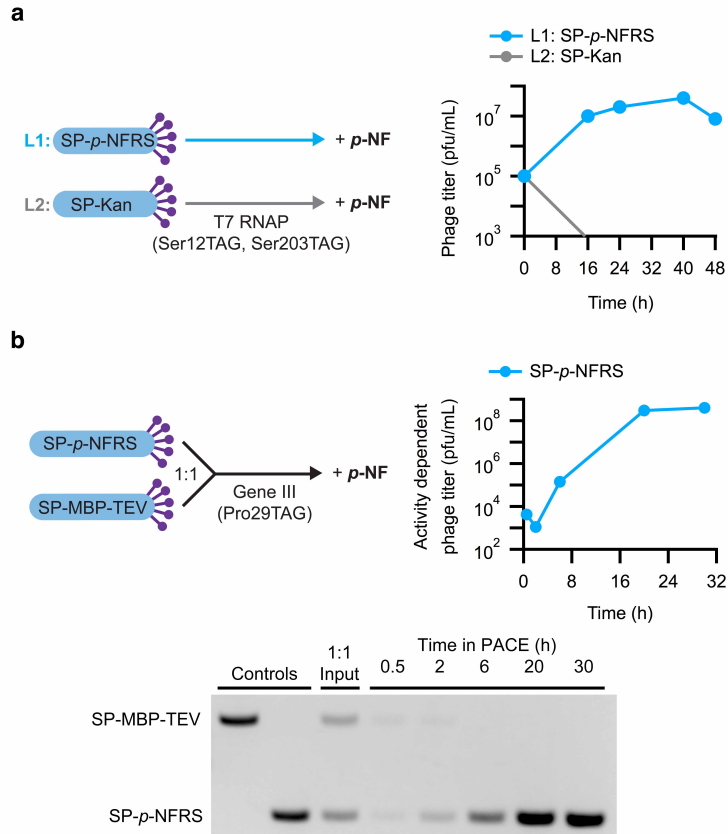

**Supplementary Figure 5.** Positive selections for aminoacylation support activity-dependent, continuous propagation in PACE. **(a)** In lagoon 1 (L1) supplemented with 1 mM  $p$ -NF, SP- $p$ -NFRS propagates for 48 h of PACE using the selection based on amber suppression of two stop codons in T7 RNAP. SP-Kan, which lacks AARS activity, however, rapidly washed out of lagoon 2 (L2) by the first time point (16 h) under identical conditions. **(b)** Phage were propagated for 30 h of PACE in the presence of 1 mM  $p$ -NF starting from a 1:1 mixture of SP- $p$ -NFRS and SP-MBP-TEV using the selection based on amber suppression of a single stop codon in gene III. Activity-dependent phage titers and PCR analysis of phage taken from each time point sampled during PACE confirmed that SP- $p$ -NFRS propagated exclusively while SP-MBP-TEV rapidly washed out.

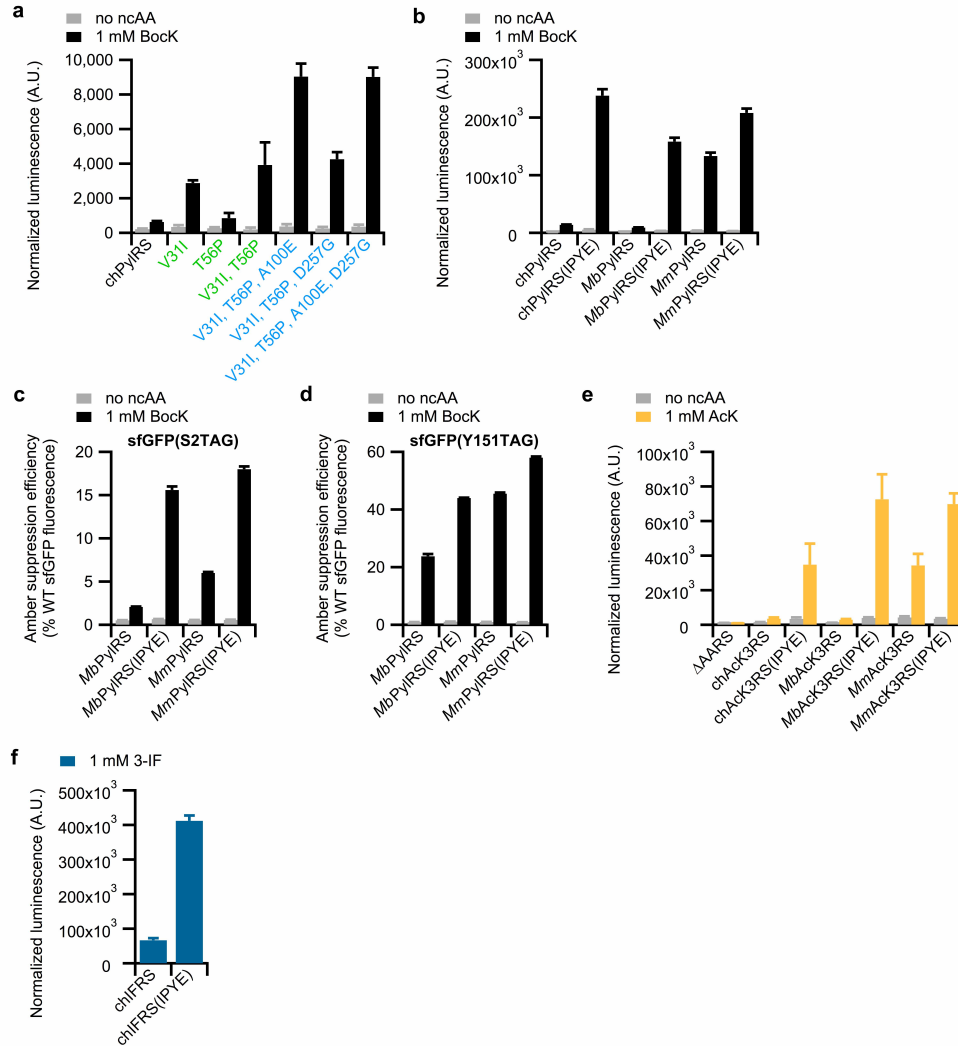

**Supplementary Figure 6.** Mutations emerging from PACE enhance the activity of PylRS variants on their target ncAA. **(a)** Contributions toward improved activity from consensus mutations in chPylRS generated during PACE segments Pyl-1 (green) and Pyl-2 (cyan). **(b, c, d)** Transplantation of the activity-enhancing PACE mutations V31I, T56P, H62Y, and A100E (IPYE) into *M. barkeri* (*Mb*) or *M. Mazei* (*Mm*) PylRS greatly improved the expression levels of luciferase containing the ncAA Bock at position 361 **(b)** and the expression levels of sfGFP containing a Bock at position 2 **(c)** or position 151 **(d)**. **(e, f)** Transplantation of the 'IPYE' mutations into multiple variants of AcK3RS **(e)** or into the chimeric IFRS **(f)** improved expression of luciferase containing the ncAA residue at position 361. Each value and error bar in **b-e** reflects the mean and s.d. of at least three independent biological replicates.



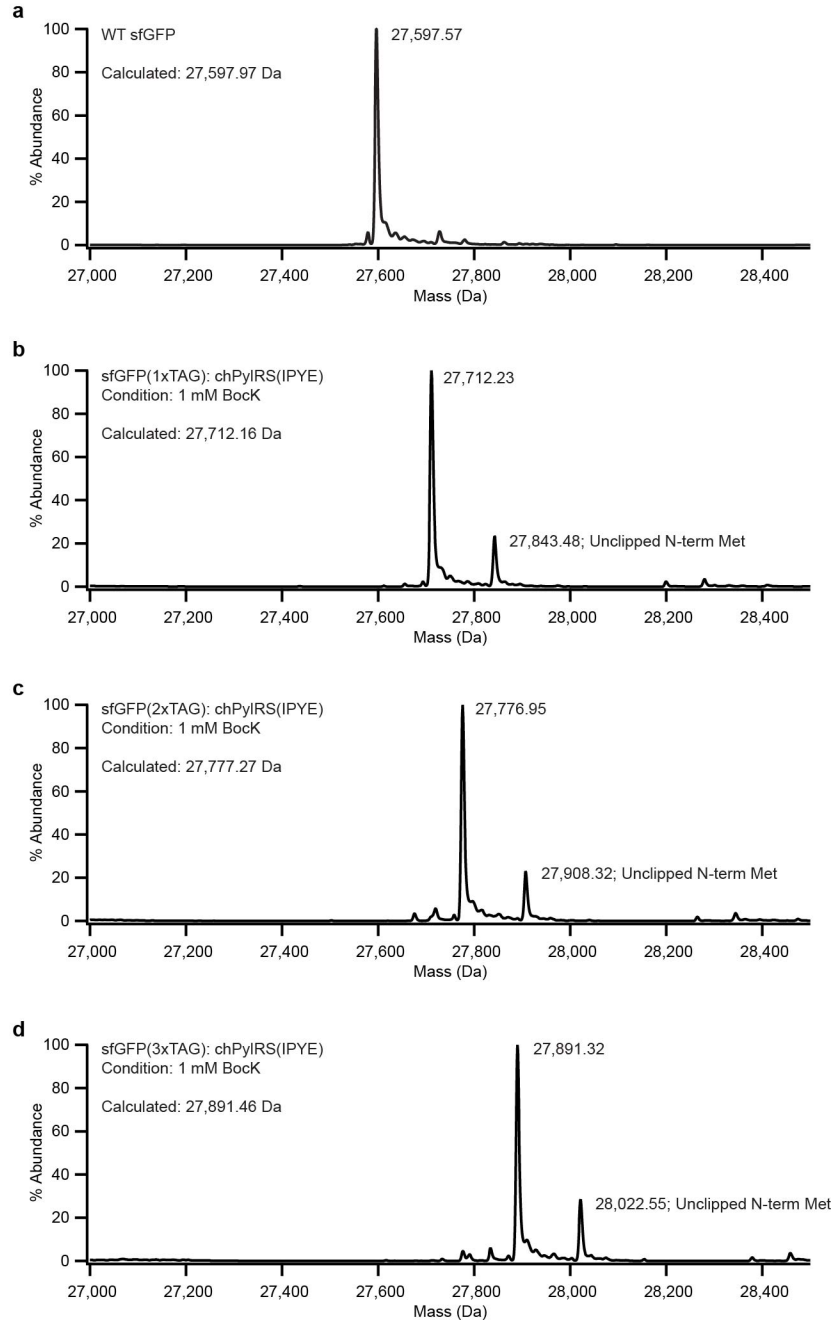

**Supplementary Figure 7.** ESI-MS analysis of purified sfGFP containing up to three Bock residues produced by chPylRS(IPYE). Analysis of purified wild type sfGFP (**a**) or sfGFP containing one (**b**), two (**c**) or three (**d**) Bock residues produced by chPylRS(IPYE) in the presence of 1 mM nCAA. Bock substitutions in sfGFP were made in response to premature amber stop codons at positions 39 (1xTAG), 39 and 151 (2xTAG), or 39, 135, and 151 (3xTAG). Protein was expressed in TOP10 cells in LB media. The major peak in each of the spectra was in agreement with the calculated mass of Bock incorporation. In each of the spectra containing Bock, a minor peak corresponding to an unclipped N-terminal methionine was also observed (calculated mass + 131.19 Da).

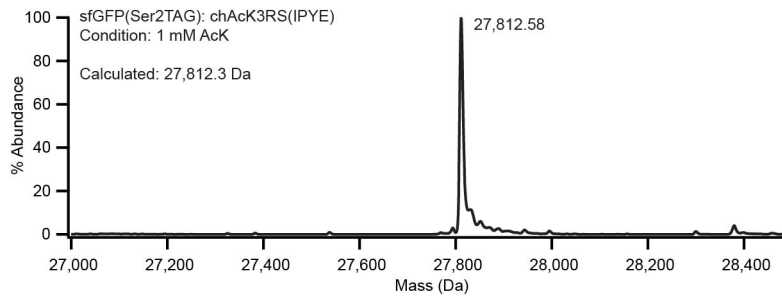

**Supplementary Figure 8.** ESI-MS analysis of purified sfGFP containing an AcK residue at position 2 produced by chAck3RS(IPYE) in the presence of 1 mM AcK. Protein was expressed in TOP10 cells in LB media, and the major peak found at 27,812.58 Da was in agreement with the calculated value (27,812.3 Da).

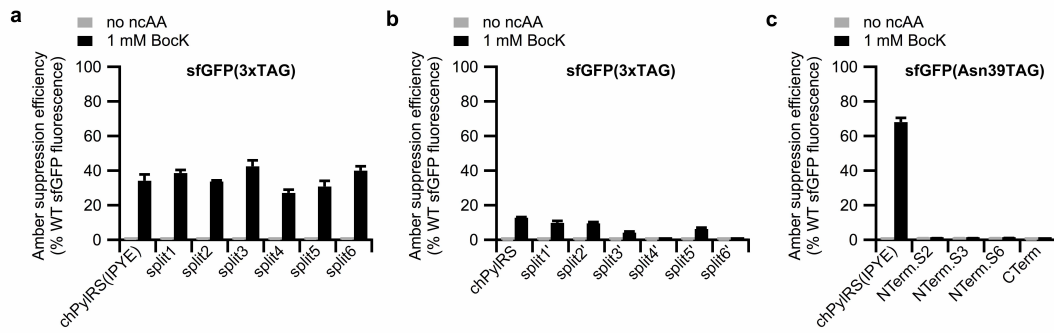

**Supplementary Figure 9.** Characterization of split variants of chPyIRS emerging from PACE. Evolved split variants of chPyIRS require the 'IPYE' tetramutation to retain high activity. Aminoacylation is dependent on both the N- and C-terminal fragments of the chPyIRS variants shown. **(a, b)** The relative expression sfGFP containing three premature stop codons at positions 39, 135, and 151 (sfGFP(3xTAG)) was compared in the presence or absence of 1 mM Bock for the six, split proteins containing the 'IPYE' tetramutation **(a)** or with variants lacking the tetramutation **(b)**. **(c)** The relative expression of sfGFP(Asn39TAG) in the presence of the unsplit chPyIRS(IPYE) was compared to expression in the presence of the N-terminal fragments of split2 (NTerm.S2), split3 (NTerm.S3), or split6 (NTerm.S6) or the C-terminal fragment (CTerm) that would result from reinitiation at Met-107. Each value and error bar reflects the mean and s.d. of four independent biological replicates.

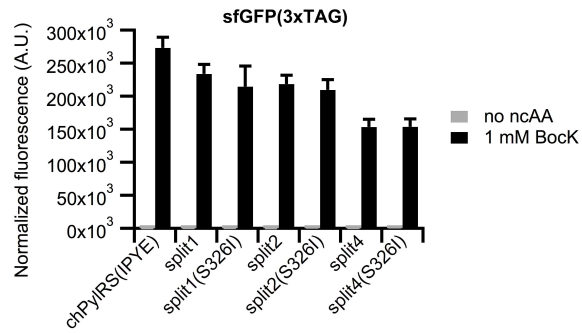

**Supplementary Figure 10.** Characterization of the S326I mutation emerging from lagoon 2 during the Pyl-3 segment of PACE. The relative activity of split1, split2, and split3 containing the additional mutation, S326I, were compared to variants lacking the mutation and to the full-length chPyIRS(IPYE). Each variant was used to produce sfGFP(3xTAG) containing three premature stop codons at positions 39, 135, and 151. Each value and error bar represents the s.d. of four independent biological replicates.

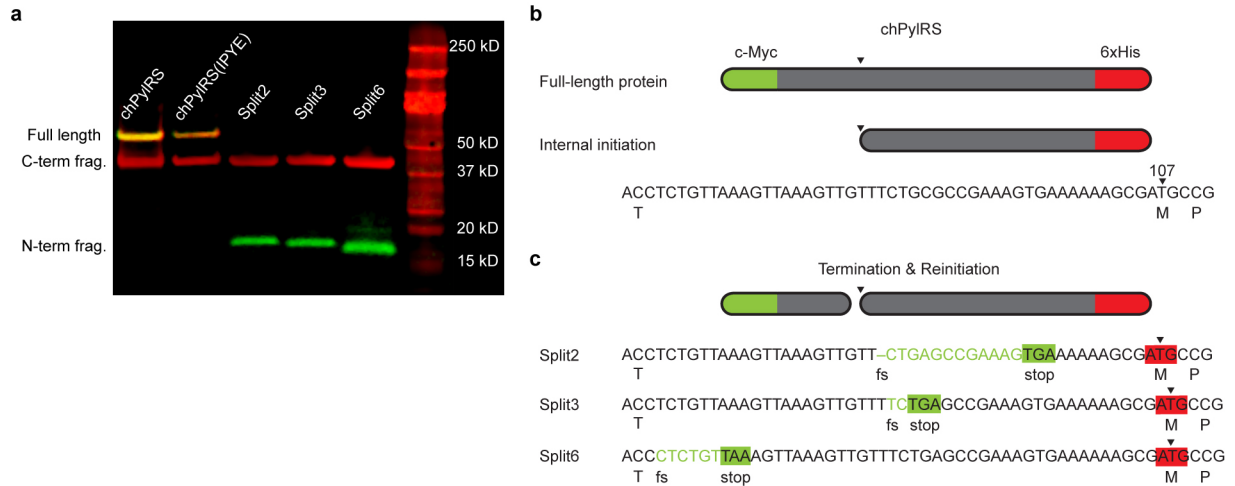

**Supplementary Figure 11.** Western blot analysis of full-length and split chPyIRS variants from PACE. **(a, b, c)** The chPyIRS variants were N-terminally fused to a c-Myc tag and C-terminally fused to a 6xHis tag to enable two-color detection of the proteins expressed in BL21 star DE3 cells. Western blot analysis of the cell lysates **(a)** indicated that chPyIRS and chPyIRS(IPYE) were expressed in two forms in a 1:1 ratio, either as a full-length protein with the N- and C-termini intact, or as a truncated C-terminal fragment. The absence of a corresponding N-terminal fragment from these variants suggests that the C-terminal fragment results from an internal start site in the gene at Met-107 **(b)**, rather than as the result of hydrolysis. Each of the split variants (split2, split3, and split 6) are expressed as two, distinct N- and C-terminal fragments indicating termination of translation at the premature stop codon due to a frameshift (fs) mutation and reinitiation at an internal start site **(c)**.

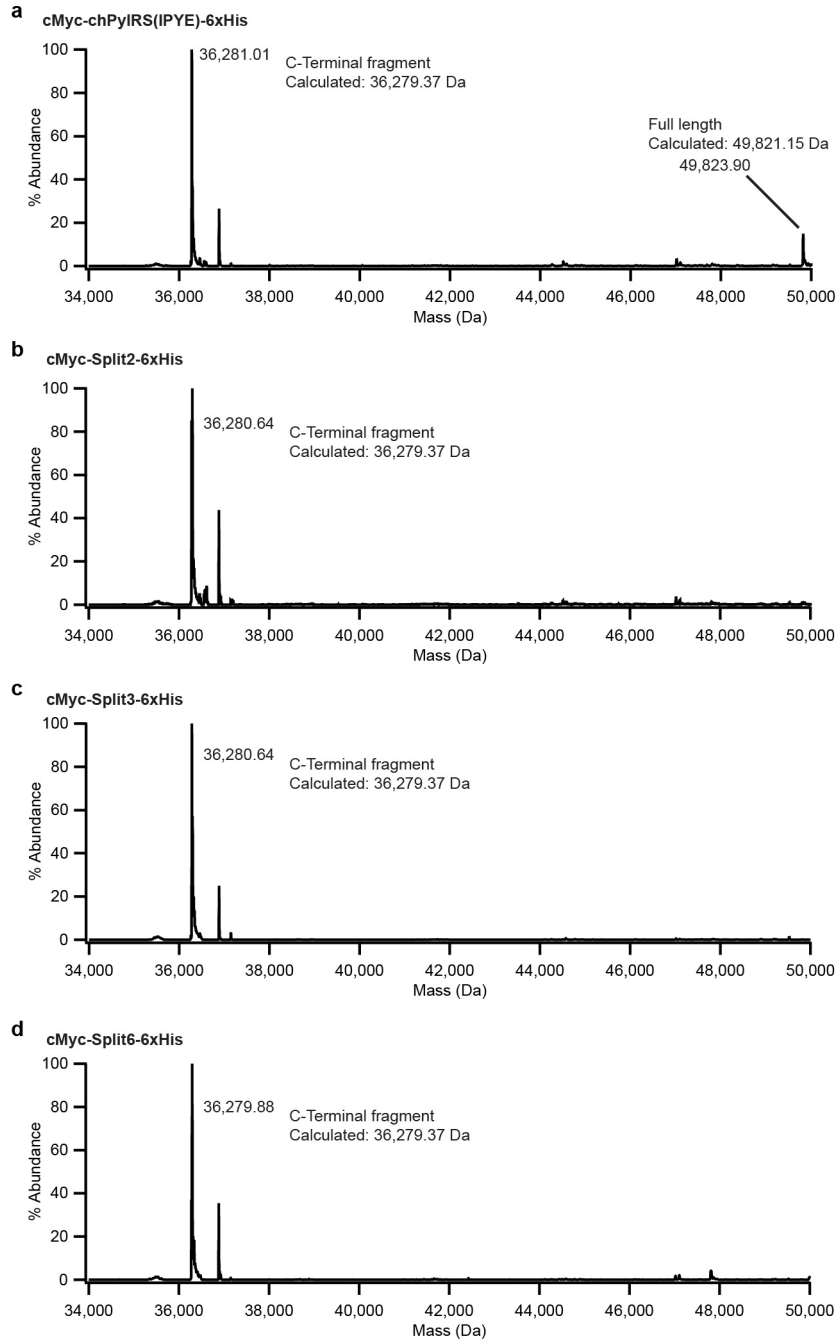

**Supplementary Figure 12.** ESI-MS analysis of affinity-tagged Ni-NTA-purified chPyIRS variants from PACE. The evolved synthetases, chPyIRS(IPYE) (**a**), Spit2 (**b**), Split3 (**c**), and Split6 (**d**) were labeled with an N-terminal c-Myc-tag and a C-terminal 6xHis-tag and purified over Ni-NTA resin prior to ESI-MS analysis. In the split variants of chPyIRS, the N-terminal fragment is lost upon affinity purification. Protein was expressed in BL21 star DE3 cells in LB media. The major peaks in each spectra were in agreement with the calculated mass of the full-length enzyme, chPyIRS(IPYE) (**a**), or the C-terminal fragment resulting from reinitiation at position Met-107 (**a-d**).

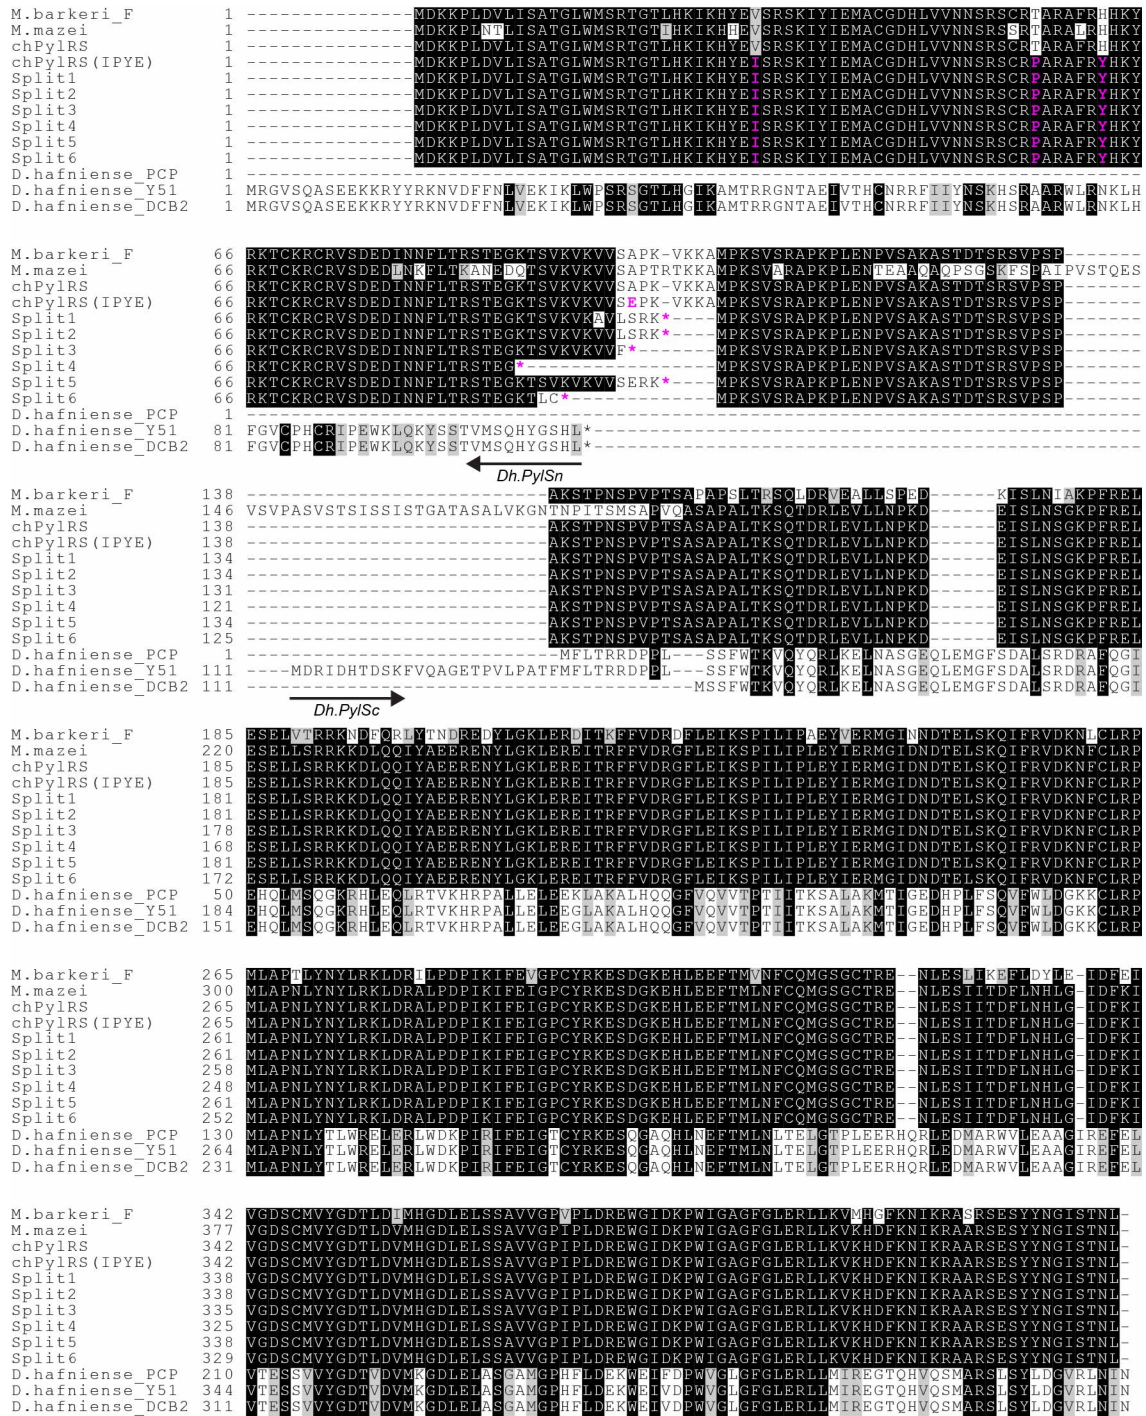

**Supplementary Figure 13.** Alignment of PylRS sequences from multiple organisms and from PACE variants. Activity enhancing mutations from PACE and premature stop codons (\*) that emerged in each of the split variants are shown in magenta. Note that the activity-enhancing A100E mutation became A100S in Split1 and Split 2 due to the frameshift. Split3, Split4, and Split6 each lack the A100E mutations because they terminate earlier in the sequence. Arrows denote the *PylSn* and *PylSc* gene products of the *D. hafniense* strains. The *PylSn* from the *D. hafniense* strain PCP-1 has not been sequenced, and is not included in the figure.

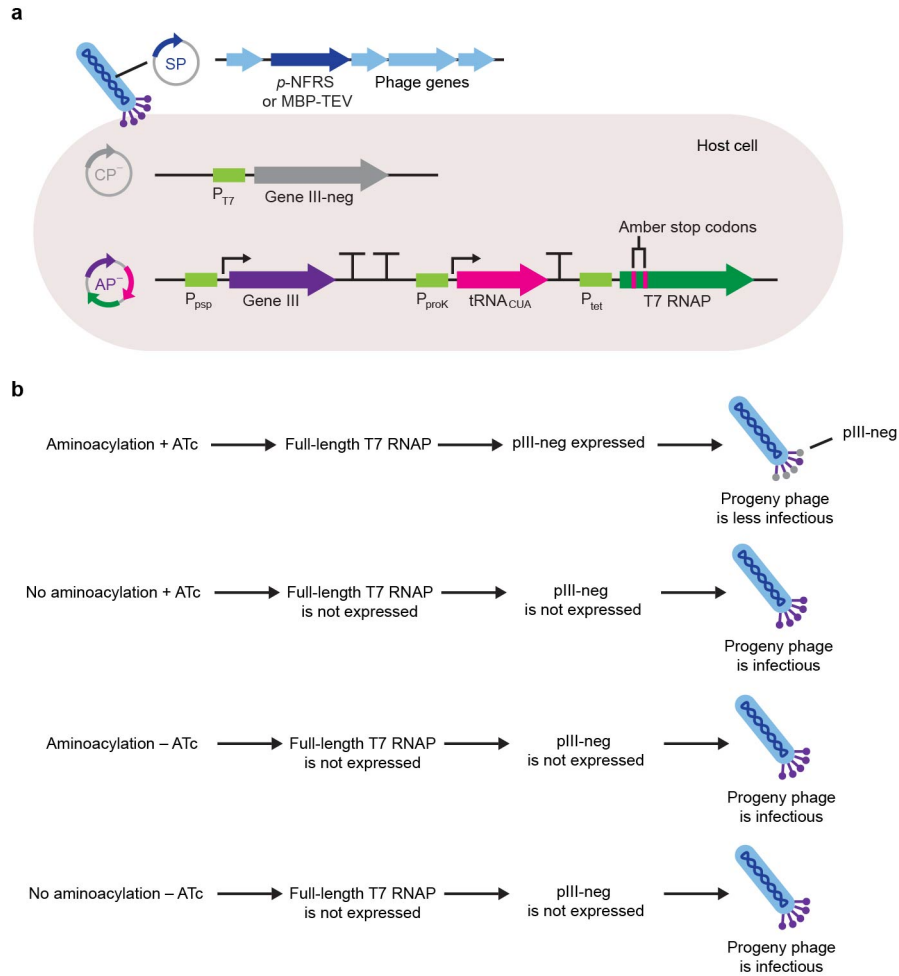

**Supplementary Figure 14.** Overview of the PACE negative selection for AARS activity using the dominant-negative variant of pIII (pIII-neg). **(a)** Diagram of PACE negative selection plasmids. PACE host cells (S1030) are cotransformed with the negative-selection accessory plasmid (AP<sup>-</sup>) and a negative-selection complementary plasmid (CP<sup>-</sup>). When an SP infects the negative selection host, production of pIII protein from gene III is induced from the phage shock promoter (P<sub>psp</sub>) of the AP<sup>-</sup>. If the AARS encoded by the SP can catalyze aminoacylation under the conditions of the negative selection (e.g., in the absence of ncAA), full-length T7 RNAP is produced from the AP<sup>-</sup> through suppression of amber stop codons at position 12 and 203 of the T7 RNAP gene. When full-length T7 RNAP is produced, expression of gene III-neg is induced from the T7 promoter (P<sub>T7</sub>) of the CP<sup>-</sup> resulting in production of the dominant-negative pIII-neg protein. The infectivity of progeny phage decreases with the amount of pIII-neg in the host cell. Expression levels of the T7 RNAP gene on the AP<sup>-</sup> are also controlled by an ATc-inducible promoter (P<sub>tet</sub>), allowing the negative selection to be turned on or off during PACE. **(b)** Diagram of inputs and outputs of the AND logic gate created by the PACE negative selection. The dominant-negative pIII-neg protein is produced only in the presence of both aminoacylation activity and ATc. In the absence of either negative-selection input, progeny phage are infectious and carry forward the encoded AARS into the subsequent round of evolution in PACE.



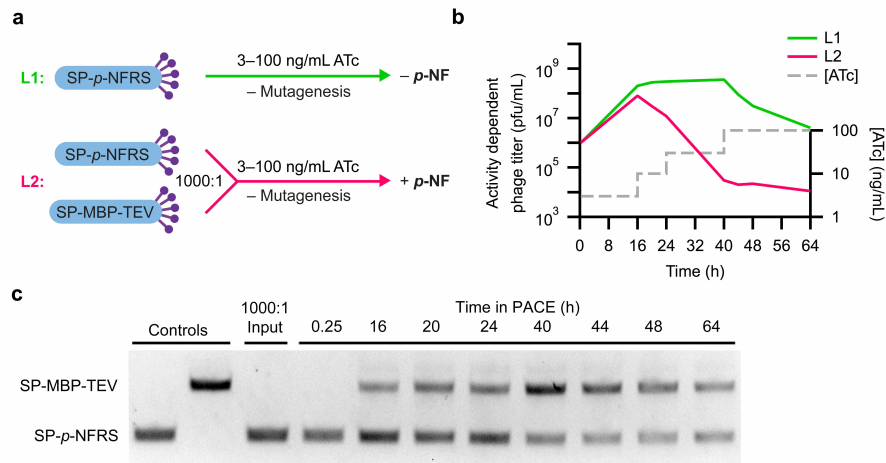

**Supplementary Figure 15.** Validation of the PACE negative selection. **(a)** Mock PACE experiments were performed in parallel to demonstrate that the negative selection is dependent on both aminoacylation activity and the concentration of ATc. In lagoon 1 (L1), SP-*p*-NFRS was propagated in the absence of substrate amino acid (-*p*-NF) to determine the maximum concentration of ATc that could be tolerated without decreasing the rate of phage propagation when aminoacylation does not occur. In lagoon 2 (L2), SP-*p*-NFRS and SP-MBP-TEV were both propagated in the presence of the *p*-NFRS substrate (+*p*-NF) to determine the minimum concentration of ATc that would support negative selection when aminoacylation does occur. **(b)** Activity-dependent titers were measured to detect the relative amount of active SP-*p*-NFRS present in the lagoons at each sampled time point of PACE. In L1 (green line), the maximum concentration of ATc (broken gray line) that did not affect phage propagation was 30 ng/mL. In L2 (magenta line), the minimum concentration of ATc that induced negative selection against aminoacylation was 10 ng/mL. **(c)** PCR analysis of phage from each sampled time point of L2 confirms that the inactive SP-MBP-TEV was selectively enriched from a 1000:1 excess of SP-*p*-NFRS at time points that correspond to ATc concentrations between 10 and 30 ng/mL (16–40 h of PACE).

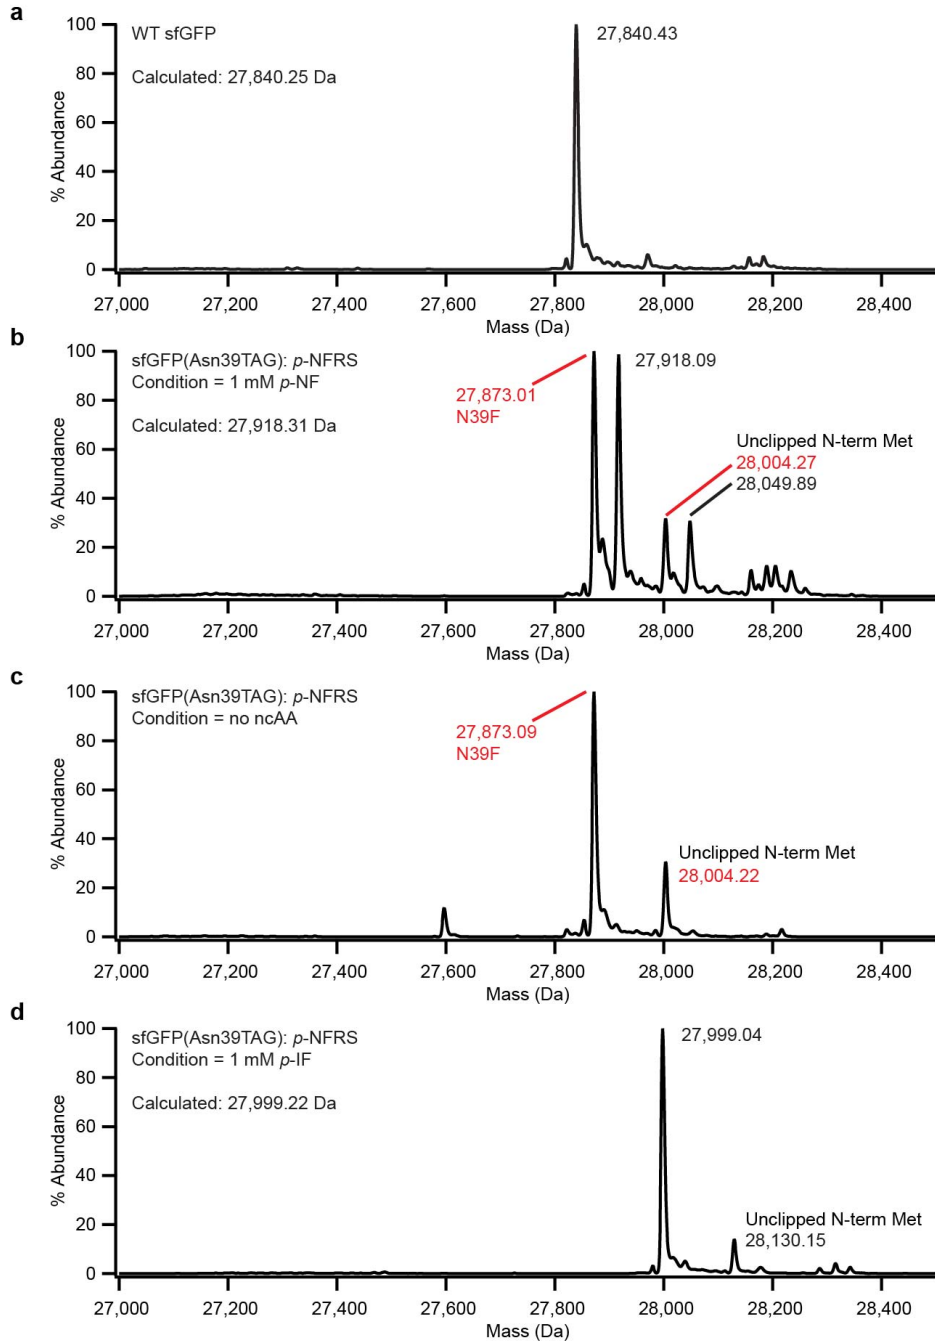

**Supplementary Figure 16.** The previously evolved AARS, *p*-NFRS, accepts multiple amino acid substrates. ESI-MS analysis of purified wild type sfGFP (**a**) or sfGFP(Asn39TAG) expressed with *p*-NFRS in the presence of 1 mM *p*-NF (**b**), no ncAA (**c**), or 1 mM *p*-IF (**d**) demonstrates that *p*-NFRS accepts Phe, *p*-NF, and *p*-IF. Protein was expressed in BL21 star DE3 cells in LB media. (**b**) A peak corresponding to incorporation of *p*-NF into sfGFP was observed at 27,918.09 Da (calculated: 27,918.31 Da). (**b, c**) Peaks corresponding to incorporation of Phe (red) were found at 27,873.01 Da and 27,873.09 Da, respectively, (calculated: 27,873.32 Da) from expression in the presence or absence of 1 mM *p*-NF. (**c**) A peak corresponding to incorporation of *p*-IF into sfGFP was found at 27,999.04 Da (calculated: 27,999.22 Da). Minor peaks in each spectrum correspond to an unclipped N-terminal methionine (calculated mass +131.19 Da).

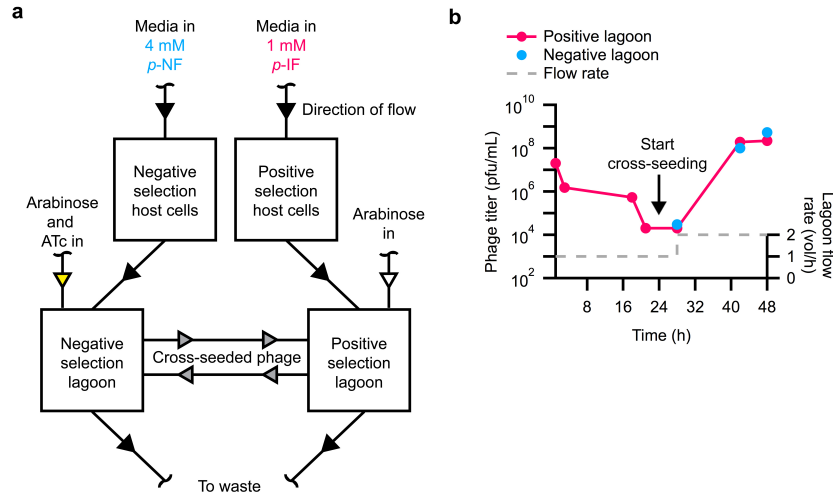

**Supplementary Figure 17.** Dual-selection PACE of the polyspecific *Mj*TyrRS variant, *p*-NFRS, to evolve selective activity on *p*-IF. **(a)** Diagram of chemostats and lagoons during dual-selection PACE. DRM media supplemented with 4 mM *p*-NF was pumped into the negative selection lagoon and DRM media supplemented with 1 mM *p*-IF was pumped into the positive selection lagoon. Host cell cultures from each chemostat were pumped through the corresponding lagoons that were supplemented with required inducers (ATc and arabinose). The opposing lagoons were coupled such that material was continuously exchanged ('cross-seeded') between each lagoon at a 50-fold slower flow rate (gray arrows) with respect to the flow rate from the chemostats through each lagoon (black arrows). **(b)** Plot of phage titers measured from samples taken at the indicated time points from each lagoon during PACE. Positive selection was conducted exclusively for the first 24 h of the experiment, and dual-selection began at the 24-h time point by cross-seeding phage between the opposing lagoons. The flow rate from the chemostats through the lagoons (broken gray line) was doubled after the two lagoons were coupled, and the flow rate of cross-seeded material was adjusted to maintain 50-fold dilution into the opposing selections.

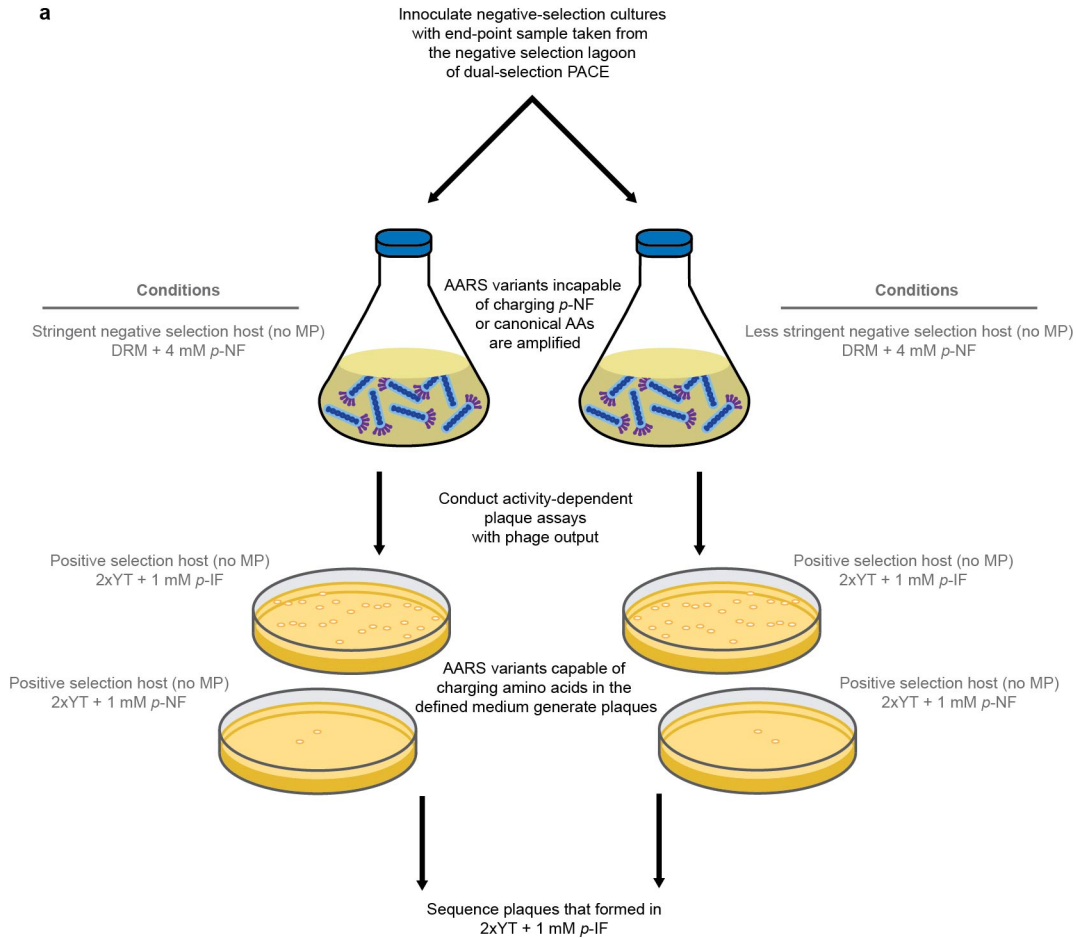

**b**

| Non-continuous negative selection | Enrichment Factor (pfu in <i>p</i> -IF / pfu in <i>p</i> -NF) | Clonal phage isolate | Mutations    |
|-----------------------------------|---------------------------------------------------------------|----------------------|--------------|
| Stringent                         | 267                                                           | lodo.1               | S107P        |
|                                   |                                                               | lodo.2               | RBS mutation |
|                                   |                                                               | lodo.3               | RBS mutation |
|                                   |                                                               | lodo.4               | RBS mutation |
| Less stringent                    | 233                                                           | lodo.5               | L69F, V235I  |
|                                   |                                                               | lodo.6               | RBS mutation |
|                                   |                                                               | lodo.7               | G163C, N211K |
|                                   |                                                               | lodo.8               | S207A        |

**Supplementary Figure 18.** Non-continuous counterselections to isolate *p*-IF-selective evolved AARS variants after dual-selection PACE. **(a)** Two counterselections were performed in parallel without enhanced mutagenesis (no MP) on the evolved pool of SP sampled from the negative-selection lagoon at the end of dual-selection PACE. Negative selections were performed in batch culture to non-continuously propagate phage lacking unwanted AARS activity on canonical amino acids and *p*-NF. The stringent negative selection (left) was performed in host cells containing an AP<sup>-</sup>:CP<sup>-</sup> pair in which the ATc-inducible promoter driving expression of T7 RNAP(Ser12TAG, Ser203TAG) on AP<sup>-</sup> (**Supplementary Fig 13a**) was replaced with the strong, P<sub>proD</sub> constitutive-promoter<sup>1</sup>. A less stringent negative selection was performed (right) using an AP<sup>-</sup>:CP<sup>-</sup> pair in which the weaker P<sub>proA</sub> constitutive-promoter<sup>1</sup> was upstream of T7 RNAP(Ser12TAG, Ser203TAG). SPs that propagated overnight in the non-continuous negative selection were isolated and used to infect positive-selection host cells to conduct activity-dependent plaque assays in the presence of *p*-NF or *p*-IF. Plaques that formed in the presence of the desired amino acid, *p*-IF, were isolated and subjected to DNA sequencing. **(b)** Results from parallel counterselections. The enrichment factor reports the number of activity-dependent plaques that formed in 1 mM *p*-IF divided by the number of plaques that formed in 1 mM *p*-NF. Mutations shown in red indicate that the ribosome-binding site (RBS) driving translation of the AARS was mutated; these clones were not further characterized.

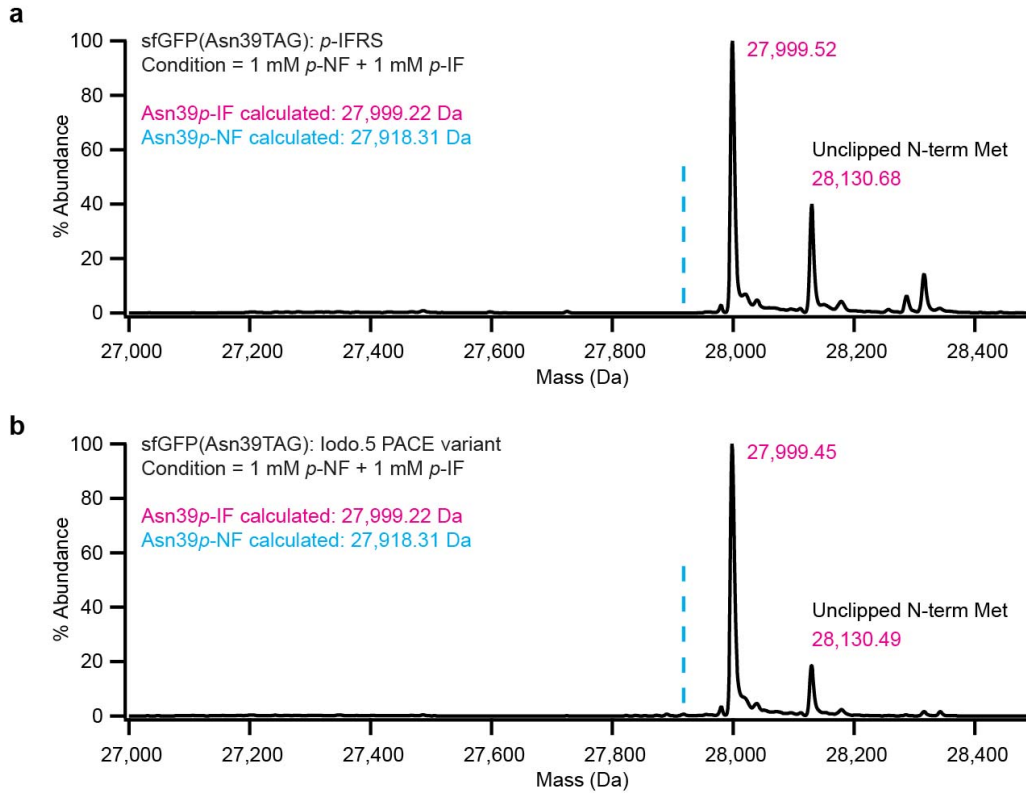

**Supplementary Figure 19.** The PACE-evolved Iodo.5 variant is highly selective for the desired substrate, *p*-IF. ESI-MS analysis of purified sfGFP from expression of sfGFP(Asn39TAG) with *p*-IFRS (**a**) or Iodo.5 (**b**) in LB media supplemented with both 1 mM *p*-NF and 1 mM *p*-IF demonstrates that each AARS enzyme selectively incorporates *p*-IF. (**a, b**) A peak corresponding to incorporation of *p*-IF into sfGFP was found at 27,999.52 Da and 27,999.45 Da, respectively (calculated: 27,999.22 Da). Incorporation of *p*-NF into sfGFP was calculated to have a mass of 27,918.31 Da (dashed blue line).

**Supplementary Table 1.** Summary of mutations observed in PACE segment Pyl-1

| chPylRS<br>Residue | Pyl-1.120.1-8 |   |   |   |   |   |   |   |
|--------------------|---------------|---|---|---|---|---|---|---|
|                    | 1             | 2 | 3 | 4 | 5 | 6 | 7 | 8 |
| D7                 |               |   | A |   |   |   |   |   |
| V31                | I             | I | I | I | F | I | I | I |
| 41A                |               |   |   |   |   | E |   |   |
| T56                | P             | P | P | P |   |   | P | P |
| A100               |               | T |   |   |   |   |   |   |
| S127               | P             |   |   | P |   |   |   |   |
| A152               | V             |   |   |   |   |   |   |   |
| D257               |               | G |   |   |   |   |   |   |
| G343               |               | D |   |   |   |   |   |   |

Mutations in chPylRS from the Pyl-1 segment were determined by Sanger sequencing of eight clonal SP isolates from 120 h of total PACE. Only coding mutations are shown. Mutations highlighted in blue were shown to be responsible for enhancing the activity of chPylRS.

**Supplementary Table 2.** Summary of mutations observed in PACE segment Pyl-2

| chPylRS<br>Residue | Pyl-2.162.1-5 |   |   |   |   | Pyl-2.189.1-5 |   |   |   |   | Pyl-2.288.1-5 |   |   |   |   |
|--------------------|---------------|---|---|---|---|---------------|---|---|---|---|---------------|---|---|---|---|
|                    | 1             | 2 | 3 | 4 | 5 | 1             | 2 | 3 | 4 | 5 | 1             | 2 | 3 | 4 | 5 |
| D2                 |               |   |   |   |   |               |   |   |   |   |               |   |   |   | E |
| D7                 | E             |   |   |   |   |               |   |   |   |   |               |   |   |   |   |
| A12                |               |   |   |   |   | G             |   |   |   |   |               |   |   |   |   |
| V31                |               | I | I | I | I | I             | I | I | I | I | I             | I | I | I | I |
| T56                |               | P | P | P | P | P             | P | P | P | P | P             | P | P | P | P |
| H62                |               |   |   |   |   | Y             |   |   |   |   |               |   |   |   |   |
| E77                |               |   |   |   |   | K             |   |   |   |   |               |   |   |   |   |
| T91                | S             |   |   |   |   |               |   |   |   |   |               |   |   |   |   |
| A100               |               |   |   |   |   |               |   |   |   |   | E             | E | E | E | E |
| K104               |               |   |   |   |   |               |   |   |   |   |               |   | E |   |   |
| R113               |               | H |   |   |   |               |   |   |   |   |               |   |   |   |   |
| L118               |               |   |   |   |   | M             |   |   |   |   |               |   |   |   |   |
| A150               |               | V |   |   |   |               |   |   |   |   |               |   |   |   |   |
| R217               |               |   |   |   |   |               |   | S |   |   |               |   |   |   |   |
| D257               |               | G | G | G | G |               | G | G | G | G |               | G | G | G | G |
| N259               |               |   |   | S |   |               |   | S |   |   |               |   |   |   |   |
| L266               |               |   |   |   |   |               |   | I |   |   |               |   | I |   |   |
| P282               |               |   |   |   |   |               |   | S |   |   |               |   |   |   |   |
| I327               |               |   |   |   | M |               | M |   |   |   |               |   |   |   |   |
| G336               |               |   |   |   |   |               |   |   |   |   | E             |   |   |   |   |
| D338               |               |   |   |   |   |               | E |   |   |   |               |   |   |   |   |

Mutations in chPylRS from the Pyl-2 segment were determined by Sanger sequencing of five clonal SP isolates from 162 h, 189 h, and 288 h of total PACE. Only coding mutations are shown. Mutations highlighted in blue were shown to be responsible for enhancing the activity of chPylRS.

**Supplementary Table 3.** Summary of mutations observed in lagoon 1 of PACE segment Pyl-3

| chPylRS<br>Residue | Pyl-3-L1.408.1-8 |   |   |   |   |   |   |   | Pyl-3-L1.450.1-8 |   |   |    |   |   |    |   | Pyl-3-L1.497.1-8 |   |   |   |   |   |    |    |
|--------------------|------------------|---|---|---|---|---|---|---|------------------|---|---|----|---|---|----|---|------------------|---|---|---|---|---|----|----|
|                    | 1                | 2 | 3 | 4 | 5 | 6 | 7 | 8 | 1                | 2 | 3 | 4  | 5 | 6 | 7  | 8 | 1                | 2 | 3 | 4 | 5 | 6 | 7  | 8  |
| V31                | I                | I | I | I | I | I | I | I | I                | I | I | I  | I | I | I  | I | I                | I | I | I | I | I | I  | I  |
| T56                | P                | P | P | P | P | P | P | P | P                | P | P | P  | P | P | P  | P | P                | P | P | P | P | P | P  | P  |
| H62                | Y                | Y | Y | Y | Y | Y | Y | Y | Y                | Y | Y | Y  | Y | Y | Y  | Y | Y                | Y | Y | Y | Y | Y | Y  | Y  |
| K90                |                  |   |   |   |   |   |   |   |                  |   |   |    |   |   |    |   |                  |   |   |   |   |   |    |    |
| V97                |                  |   |   |   |   |   |   |   |                  |   |   |    |   |   |    |   |                  | A |   |   | A |   |    | A  |
| S99                |                  |   |   |   |   |   |   | L |                  |   |   | L  |   |   |    |   |                  | L | L | L | L |   | L  | L  |
| A100               | E                | E | E | E | E | E | E | E | E                | E | E | E  | E | E | E  | E | E                | S | S | S | S |   | S  | S  |
| P101               |                  |   |   |   |   |   |   |   |                  |   |   |    |   |   |    |   |                  | R |   |   |   |   |    | R  |
| V103               |                  |   |   |   |   |   |   |   |                  |   |   | *  |   | * |    |   |                  | * | * | * | * |   | *  | *  |
| K104               |                  | E |   |   |   |   |   |   |                  |   |   |    |   |   |    |   |                  |   |   |   |   |   |    |    |
| A106               |                  |   | T |   |   |   |   |   |                  |   |   |    |   |   |    |   |                  |   |   |   |   |   |    |    |
| M107               |                  |   |   |   |   |   |   |   |                  |   |   | M' |   |   | M' |   |                  |   |   |   |   |   | M' | M' |
| V111               |                  |   |   |   |   |   |   |   |                  |   |   |    |   |   |    |   |                  |   |   |   |   |   |    |    |
| A114               |                  |   |   |   |   |   |   |   |                  |   |   |    |   |   |    |   |                  |   |   |   |   |   |    |    |
| V122               |                  |   |   |   |   |   |   |   |                  |   |   |    |   |   |    |   |                  |   |   |   |   |   |    |    |
| V134               | I                |   |   |   |   |   |   |   |                  |   |   |    |   |   |    |   |                  |   |   |   |   |   |    |    |
| K157               |                  | R |   |   |   |   |   |   |                  |   |   |    |   |   |    |   |                  |   |   |   |   |   |    |    |
| S156               |                  |   |   |   |   |   |   |   |                  |   |   |    |   |   |    |   |                  |   |   |   |   |   |    |    |
| E203               |                  |   |   |   |   |   |   |   |                  |   |   |    |   |   |    |   |                  |   |   |   |   |   |    |    |
| Y207               |                  | S |   |   |   |   |   |   |                  |   |   |    |   |   |    |   |                  |   |   |   |   |   |    |    |
| K251               |                  |   |   |   |   |   |   |   |                  |   |   |    |   |   |    |   |                  |   |   |   |   |   |    | R  |
| D257               | G                | G | G | G | G | G | G | G | G                | G | G | G  | G | G | G  | G | G                | G | G | G | G | G | G  | G  |
| N259               |                  | S |   |   |   |   |   |   |                  |   |   |    |   |   |    |   |                  |   |   |   |   |   |    |    |
| F260               |                  |   | S |   |   |   |   |   |                  |   |   |    |   |   |    |   |                  |   |   |   |   |   |    |    |
| L266               |                  |   |   |   |   |   |   |   |                  |   |   |    |   |   |    |   |                  |   |   |   |   |   |    |    |
| N323               |                  |   |   |   |   |   |   |   |                  |   |   |    |   |   |    |   |                  |   |   |   |   |   |    | S  |
| S326               |                  |   |   |   |   |   |   |   |                  |   |   |    |   |   |    |   |                  |   |   |   |   |   |    |    |
| H334               |                  | T |   |   |   |   |   |   |                  |   |   |    |   |   |    |   |                  |   |   |   |   |   |    |    |
| L335               |                  | W |   |   |   |   |   |   |                  |   |   |    |   |   |    |   |                  |   |   |   |   |   |    |    |
| D351               |                  |   |   |   |   |   |   |   |                  |   |   |    |   |   |    |   |                  |   |   |   |   |   |    |    |
| K396               |                  |   |   |   |   |   |   |   |                  |   |   |    |   |   |    |   |                  |   |   |   |   |   |    |    |
| K403               |                  |   |   |   |   |   |   |   |                  |   |   |    |   |   |    |   |                  |   |   |   |   |   |    | R  |
| A405               |                  |   |   |   |   |   |   |   |                  |   |   |    |   |   |    |   |                  |   |   |   |   |   |    | V  |
| A406               |                  |   |   |   |   |   |   |   |                  |   |   |    |   |   |    |   |                  |   |   |   |   |   |    |    |
|                    |                  |   |   |   |   |   |   |   |                  |   |   |    |   |   |    |   |                  |   |   |   |   |   |    | S  |

Mutations in chPylRS from lagoon 1 (L1) of the Pyl-3 segment were determined by Sanger sequencing of eight clonal SP isolates from 408 h, 450 h, and 497 h of total PACE. Only coding mutations are shown. Mutations highlighted in blue were shown to be responsible for enhancing the activity of chPylRS. Mutations highlighted in red indicate stop codons that resulted in split-protein variants in which translation reinitiates at the position corresponding to Met-107 of chPylRS (M', highlighted in green).



**Supplementary Table 4.** Summary of mutations observed in lagoon 2 of PACE segment Pyl-3

| chPylRS Residue | Pyl3-L2.408.1-8 |   |   |   |   |   |   |   | Pyl3-L2.450.1-8 |   |   |   |    |   |   |   | Pyl3-L2.497.1-8 |   |   |   |   |   |   |   |   |   |   |   |   |
|-----------------|-----------------|---|---|---|---|---|---|---|-----------------|---|---|---|----|---|---|---|-----------------|---|---|---|---|---|---|---|---|---|---|---|---|
|                 | 1               | 2 | 3 | 4 | 5 | 6 | 7 | 8 | 1               | 2 | 3 | 4 | 5  | 6 | 7 | 8 | 1               | 2 | 3 | 4 | 5 | 6 | 7 | 8 |   |   |   |   |   |
| V8              |                 |   |   |   |   |   |   |   |                 |   |   |   |    |   |   |   |                 |   |   |   |   |   |   |   |   |   |   |   |   |
| T20             |                 |   |   |   |   |   |   | P |                 |   |   |   |    |   |   |   |                 |   |   | P |   |   | P |   |   |   |   |   |   |
| I26             |                 |   |   | V |   |   |   |   |                 |   |   |   |    |   |   |   |                 |   |   |   |   |   |   |   |   |   |   |   |   |
| H28             |                 |   |   |   |   |   |   |   |                 |   |   |   |    |   |   |   |                 |   |   |   |   |   |   |   |   |   |   |   | Y |
| V31             | I               | I | I | I | I | I | I | I | I               | I | I | I | I  | I | I | I | I               | I | I | I | I | I | I | I | I | I | I | I | I |
| D44             |                 |   |   |   |   |   |   |   |                 |   |   |   |    |   |   |   |                 |   |   |   |   |   |   |   |   |   |   |   |   |
| H45             |                 |   |   |   |   |   |   |   |                 | R |   |   |    |   |   |   |                 |   |   |   |   |   |   |   |   |   |   |   |   |
| S53             |                 |   |   |   |   |   |   | F |                 |   |   |   |    |   |   |   |                 |   |   |   |   |   |   |   |   |   |   |   |   |
| T56             | P               | P | P | P | P | P | P | P | P               | P | P | P | P  | P | P | P | P               | P | P | P | P | P | P | P | P | P | P | P | P |
| A59             |                 |   |   |   |   |   |   | T |                 |   |   |   |    |   |   |   |                 |   |   |   |   |   |   |   |   |   |   |   |   |
| H62             | Y               | Y | Y | Y | Y | Y | Y | Y | Y               | Y | Y | Y | Y  | Y | Y | Y | Y               | Y | Y | Y | Y | Y | Y | Y | Y | Y | Y | Y | Y |
| R73             |                 |   |   |   |   |   |   |   |                 |   |   |   |    |   |   |   |                 |   |   |   |   |   |   |   |   |   |   |   |   |
| D78             |                 |   |   |   |   |   |   |   |                 |   |   |   |    |   |   |   |                 |   |   |   |   |   |   |   |   |   |   |   |   |
| N80             |                 |   |   |   |   |   |   |   |                 |   |   |   |    |   |   |   |                 |   |   |   |   |   |   |   |   |   |   |   | D |
| T91             |                 |   |   |   |   |   |   |   |                 | A |   |   |    |   |   |   |                 |   |   |   |   |   |   |   |   |   |   |   |   |
| S92             |                 |   |   |   |   |   |   |   |                 |   |   |   |    |   |   |   |                 |   |   |   |   |   |   |   |   |   |   |   |   |
| V93             |                 |   |   |   |   |   |   |   |                 |   |   |   |    |   |   |   |                 |   |   |   |   |   |   |   |   |   |   |   |   |
| K94             |                 |   |   |   |   |   |   |   |                 |   |   |   |    |   |   |   |                 |   |   |   |   |   |   |   |   |   |   |   |   |
| S99             |                 |   |   |   |   |   |   |   |                 |   |   |   |    | F |   |   |                 |   |   |   |   |   |   |   |   |   |   |   |   |
| A100            | E               | E | E | E | E | E | E | E | E               | E | E | E | *  | E | E | E | E               | E | E | E | E | E | E | E | E | E | E | E |   |
| P101            |                 |   |   |   |   |   |   |   |                 |   |   |   |    |   |   |   |                 |   |   |   |   |   |   |   |   |   |   | R |   |
| V103            |                 |   |   |   |   |   |   |   |                 |   |   |   |    |   |   |   |                 |   |   |   |   |   |   |   |   |   | * |   |   |
| M107            |                 |   |   |   |   |   |   |   |                 |   |   |   | M' |   |   |   |                 |   |   |   |   |   |   |   |   |   |   |   |   |
| S112            |                 |   |   |   |   |   |   |   |                 |   |   |   |    | P |   |   |                 |   |   |   |   |   |   |   |   |   |   |   |   |
| E119            |                 |   |   |   |   |   |   |   |                 |   |   |   |    |   |   |   |                 |   |   |   |   |   |   |   |   |   |   |   |   |
| N120            |                 |   |   |   |   |   |   |   |                 |   |   |   |    |   |   |   |                 |   |   |   |   |   |   |   |   |   |   |   |   |
| A126            |                 |   |   |   |   |   |   |   |                 |   |   |   |    |   |   |   |                 |   |   |   |   |   |   |   |   |   |   | T |   |
| T130            |                 |   |   |   |   |   |   |   |                 |   |   |   |    |   |   |   |                 |   |   |   |   |   |   |   |   |   |   |   |   |
| N143            |                 |   |   | K |   |   |   |   |                 |   |   |   |    |   |   |   |                 |   |   |   |   |   |   |   |   |   |   |   |   |
| P147            |                 |   |   |   |   |   |   |   |                 |   |   |   |    |   |   |   |                 |   |   |   |   |   |   |   |   |   |   |   |   |
| P153            |                 |   |   |   |   |   |   |   |                 |   |   |   |    |   |   |   |                 |   |   |   |   |   |   |   |   |   |   |   |   |
| P234            |                 |   |   |   |   |   |   |   |                 |   |   |   |    |   |   |   |                 |   |   |   |   |   |   |   |   |   |   |   |   |
| E236            |                 |   |   |   |   |   |   |   |                 |   |   |   |    |   |   |   |                 |   |   |   |   |   |   |   |   |   |   | G |   |
| D257            | G               | G | G | G | G | G | G | G | G               | G | G | G | G  | G | G | G | G               | G | G | G | G | G | G | G | G | G | G | G | G |
| K258            |                 |   |   |   |   |   |   |   |                 |   |   |   |    |   |   |   |                 |   |   |   |   |   |   |   |   |   |   |   | E |
| R321            |                 |   |   |   |   |   |   |   |                 |   |   |   |    |   |   |   |                 |   |   |   |   |   |   |   |   |   |   |   |   |
| S326            |                 |   |   |   |   |   |   |   |                 |   |   |   |    |   |   |   |                 |   |   |   |   |   |   |   |   |   |   |   |   |
| G343            |                 |   |   |   |   |   |   |   |                 |   |   |   |    |   |   |   |                 |   |   |   |   |   |   |   |   |   |   |   | D |
| V367            |                 |   |   |   |   |   |   |   |                 |   |   |   |    |   |   |   |                 |   |   |   |   |   |   |   |   |   |   |   |   |
| I378            |                 |   |   |   |   |   |   |   |                 |   |   |   |    |   |   |   |                 |   |   |   |   |   |   |   |   |   |   |   |   |
| D379            |                 |   |   |   |   |   |   |   |                 |   |   |   |    |   |   |   |                 |   |   |   |   |   |   |   |   |   |   |   |   |
| A406            |                 |   |   |   |   |   |   |   |                 |   |   |   |    |   |   |   |                 |   |   |   |   |   |   |   |   |   |   |   |   |

Mutations in chPylRS from lagoon 2 (L2) of the Pyl-3 segment were determined by Sanger sequencing of eight clonal SP isolates from 408 h, 450 h, and 497 h of total PACE. Only coding mutations are shown. Mutations highlighted in blue were shown to be responsible for enhancing the activity of chPylRS. Mutations highlighted in red indicate stop codons that resulted in split-protein variants in which translation reinitiates at the position corresponding to Met-107 of chPylRS (M', highlighted in green).

**Supplementary Table 5.** Kinetic parameters of chPyIRS variants using L-pyrrolysine substrate

| PyIRS variant     | $k_{cat}$ , $s^{-1} \times 10^{-3}$ | $K_M^{Pyl}$ , $\mu M$ |
|-------------------|-------------------------------------|-----------------------|
| chPyIRS           | $33.24 \pm 2.74$                    | $21.03 \pm 0.15$      |
| V31I, T56P, A100E | $289.16 \pm 11.45$                  | $18.42 \pm 0.69$      |

The mean values and standard errors were calculated from three replicates.

**Supplementary Table 6.** Kinetic parameters of the fusions of split chPyIRS variants from PACE.

| AARS variant | $k_{\text{cat}}, \text{s}^{-1} \times 10^{-3}$ | $K_{\text{M}}^{\text{Bock}}, \text{mM}$ | $K_{\text{M}}^{\text{tRNA}}, \mu\text{M}$ |
|--------------|------------------------------------------------|-----------------------------------------|-------------------------------------------|
| Fused Split2 | 20 ± 1                                         | 1.68 ± 0.19                             | 3.62 ± 0.51                               |
| Fused Split3 | 33 ± 3                                         | 4.90 ± 0.92                             | 3.84 ± 0.34                               |
| Fused Split6 | 19 ± 0.2                                       | 1.00 ± 0.05                             | 3.61 ± 0.38                               |

The mean values and standard errors were calculated from three replicates.

**Supplementary Table 7.** Kinetic parameters of *Mj*TyrRS variants containing mutations from PACE.

| AARS variant   | ncAA         | $k_{\text{cat}}, \text{s}^{-1} \times 10^{-3}$ | $K_{\text{M}}^{\text{ncAA}}, \text{mM}$ | $k_{\text{cat}}/K_{\text{M}}^{\text{ncAA}}, \text{mM}^{-1} \cdot \text{s}^{-1} \times 10^{-3}$ | Relative catalytic efficiency |
|----------------|--------------|------------------------------------------------|-----------------------------------------|------------------------------------------------------------------------------------------------|-------------------------------|
| <i>p</i> -NFRS | <i>p</i> -NF | 1.40 ± 0.05                                    | 3.68 ± 0.29                             | 0.38                                                                                           | 1.00                          |
| <i>p</i> -NFRS | <i>p</i> -IF | 0.87 ± 0.11                                    | 2.23 ± 0.46                             | 0.39                                                                                           | 1.03                          |
| <i>p</i> -NFRS | Phe          | 0.14 ± 0.003                                   | 0.16 ± 0.03                             | 0.875                                                                                          | 2.3                           |
| Iodo.5         | <i>p</i> -NF | ND                                             | ND                                      | ND                                                                                             | ND                            |
| Iodo.5         | <i>p</i> -IF | ND                                             | ND                                      | ND                                                                                             | ND                            |
| Iodo.1         | <i>p</i> -IF | 1.60 ± 1.27                                    | 5.65 ± 1.82                             | 0.28                                                                                           | 0.74                          |
| Iodo.7         | <i>p</i> -IF | 0.21 ± 0.03                                    | 0.92 ± 0.22                             | 0.23                                                                                           | 0.61                          |
| Iodo.8         | <i>p</i> -IF | 1.00 ± 0.10                                    | 3.80 ± 0.84                             | 0.26                                                                                           | 0.68                          |

The mean values and standard errors were calculated from three replicates. ND, not determined due to loss of activity upon purification.

**Supplementary Table 8. Plasmids used in this work**

| Plasmid Name    | Class (resistance)                   | Origin  | ORF1              |                                             | ORF2              |                                    | ORF3                 |             | PACE Experiments     | Figs                     |
|-----------------|--------------------------------------|---------|-------------------|---------------------------------------------|-------------------|------------------------------------|----------------------|-------------|----------------------|--------------------------|
|                 |                                      |         | Prom              | [RBS] <sup>2</sup> Genes                    | Prom              | Genes                              | Prom                 | [RBS] Genes |                      |                          |
| pDB007(+)       | AP (carb <sup>R</sup> )              | SC101   | P <sub>T7</sub>   | [SD8] gIII, luxAB                           | P <sub>ProK</sub> | tyrT <sup>Opt</sup> <sub>CUA</sub> | -                    | -           | p-NFRS               | 1, 3a, 5c, S3a, S4a      |
| pDB021CH(+)     | AP (carb <sup>R</sup> )              | SC101   | P <sub>T7</sub>   | [SD8] gIII, luxAB                           | P <sub>ProK</sub> | pylT                               | -                    | -           | Pyl-1, Pyl-2         | 1, 4a, S3b               |
| pDB026a         | AP (carb <sup>R</sup> )              | SC101   | P <sub>psp</sub>  | [SD8] gIII(P29*), luxAB                     | P <sub>ProK</sub> | tyrT <sup>Opt</sup> <sub>CUA</sub> | -                    | -           |                      | S3c, S4b                 |
| pDB026b         | AP (carb <sup>R</sup> )              | SC101   | P <sub>psp</sub>  | [SD8] gIII(P83*), luxAB                     | P <sub>ProK</sub> | tyrT <sup>Opt</sup> <sub>CUA</sub> | -                    | -           |                      | S3c                      |
| pDB026c         | AP (carb <sup>R</sup> )              | SC101   | P <sub>psp</sub>  | [SD8] gIII(T177*), luxAB                    | P <sub>ProK</sub> | tyrT <sup>Opt</sup> <sub>CUA</sub> | -                    | -           |                      | S3c                      |
| pDB026d         | AP (carb <sup>R</sup> )              | SC101   | P <sub>psp</sub>  | [SD8] gIII(Y184*), luxAB                    | P <sub>ProK</sub> | tyrT <sup>Opt</sup> <sub>CUA</sub> | -                    | -           |                      | S3c                      |
| pDB026e         | AP (carb <sup>R</sup> )              | SC101   | P <sub>psp</sub>  | [SD8] gIII(P29*, Y184*), luxAB              | P <sub>ProK</sub> | tyrT <sup>Opt</sup> <sub>CUA</sub> | -                    | -           |                      | S3c                      |
| pDB026f         | AP (carb <sup>R</sup> )              | SC101   | P <sub>psp</sub>  | [SD8] gIII(P29*, P83*, Y184*), luxAB        | P <sub>ProK</sub> | tyrT <sup>Opt</sup> <sub>CUA</sub> | -                    | -           |                      | S3c                      |
| pDB026g         | AP (carb <sup>R</sup> )              | SC101   | P <sub>psp</sub>  | [SD8] gIII(P29*, P83*, T177*, Y184*), luxAB | P <sub>ProK</sub> | tyrT <sup>Opt</sup> <sub>CUA</sub> | -                    | -           |                      | S3c                      |
| pJC175e         | AP (carb <sup>R</sup> )              | SC101   | P <sub>psp</sub>  | [SD8] gIII, luxAB                           | -                 | -                                  | -                    | -           |                      | Activity indep. titers   |
| pDB038          | AP (spec <sup>R</sup> )              | ColE1   | P <sub>psp</sub>  | [SD8] gIII(P29*), luxAB                     | P <sub>ProK</sub> | pylT                               | -                    | -           | Pyl-3                | 1, 4a, S3d               |
| pDB038a         | AP (spec <sup>R</sup> )              | ColE1   | P <sub>psp</sub>  | [SD8] gIII(P29*, Y184*), luxAB              | P <sub>ProK</sub> | pylT                               | -                    | -           | Pyl-3                | 1, 4a, S3d               |
| pDB038b         | AP (spec <sup>R</sup> )              | ColE1   | P <sub>psp</sub>  | [SD8] gIII(P29*, P83*, Y184*), luxAB        | P <sub>ProK</sub> | pylT                               | -                    | -           | Pyl-3                | 1, 4a, S3d               |
| pDB007ns2a      | AP <sup>-</sup> (carb <sup>R</sup> ) | SC101   | P <sub>psp</sub>  | [SD8] gIII                                  | P <sub>ProK</sub> | tyrT <sup>Opt</sup> <sub>CUA</sub> | P <sub>tet</sub>     | [SD4]       | p-NFRS               | 5a-c, S13, S14, S16      |
| pDB036a         | AP <sup>-</sup> (carb <sup>R</sup> ) | SC101   | P <sub>psp</sub>  | [SD8] gIII                                  | P <sub>ProK</sub> | tyrT <sup>Opt</sup> <sub>CUA</sub> | P <sub>prod</sub>    | [SD4]       | Countersel.          | S17                      |
| pDB036d         | AP <sup>-</sup> (carb <sup>R</sup> ) | SC101   | P <sub>psp</sub>  | [SD8] gIII                                  | P <sub>ProK</sub> | tyrT <sup>Opt</sup> <sub>CUA</sub> | P <sub>proA</sub>    | [SD4]       | Countersel.          | S17                      |
| pDB023f         | CP (spec <sup>R</sup> )              | ColE1   | P <sub>psp</sub>  | [SD8] T7RNAP(S12*, S203*)                   | -                 | -                                  | -                    | -           | Pyl-1, Pyl-2         | 1, 4a, S3b               |
| pDB023f1        | CP (spec <sup>R</sup> )              | ColE1   | P <sub>psp</sub>  | [SD4] T7RNAP(S12*, S203*)                   | -                 | -                                  | -                    | -           | p-NFRS               | 1, 3a, 5c, S3a, S4a      |
| pDB023k         | CP (spec <sup>R</sup> )              | ColE1   | P <sub>psp</sub>  | [SD8] T7RNAP(S12*, S203*, S527*)            | -                 | -                                  | -                    | -           |                      | 1, S3b                   |
| pDB016          | CP <sup>-</sup> (spec <sup>R</sup> ) | ColE1   | P <sub>T7</sub>   | [SD8] gIII-neg                              | -                 | -                                  | -                    | -           | p-NFRS, Countersel.  | 5a-c, S13, S14, S16, S17 |
| DP4             | DP (chlor <sup>R</sup> )             | cloDF13 | P <sub>psp</sub>  | dnaQ926, dam, seqA                          | P <sub>C</sub>    | araC                               | P <sub>psp-tet</sub> | [sd8] gIII  | Pyl-1, Pyl-2, p-NFRS | 4a, 5c                   |
| DP6             | DP (chlor <sup>R</sup> )             | cloDF13 | P <sub>psp</sub>  | dnaQ926, dam, seqA, emrR, ugi, cda1         | P <sub>C</sub>    | araC                               | P <sub>psp-tet</sub> | [sd8] gIII  | Pyl-3                | 4a                       |
| pBAD-sfGFP      | EP (carb <sup>R</sup> )              | pBR322  | P <sub>BAD</sub>  | sfGFP-6xHis variant                         | P <sub>C</sub>    | araC                               | -                    | -           |                      | 4d-e, S5c-d, S6-S9       |
| pDB005x(-)      | EP (carb <sup>R</sup> )              | SC101   | P <sub>lacZ</sub> | [SD8] chPylRS                               | P <sub>ProK</sub> | pylT                               | P <sub>T7</sub>      | [SD8] luxAB |                      | SF2                      |
| pDB007xb(-)     | EP (carb <sup>R</sup> )              | SC101   | P <sub>lacZ</sub> | [SD8] p-NFRS                                | P <sub>ProK</sub> | tyrT <sup>Opt</sup> <sub>CUA</sub> | P <sub>T7</sub>      | [SD8] luxAB |                      | SF2                      |
| pDB027c         | EP (carb <sup>R</sup> )              | SC101   | P <sub>BAD</sub>  | [SD8] luxAB(Y361*), [SD8] M/TyrRS variant   | P <sub>ProK</sub> | tyrT <sup>Opt</sup> <sub>CUA</sub> | P <sub>C</sub>       | araC        |                      | 3b                       |
| pDB032c         | EP (carb <sup>R</sup> )              | SC101   | P <sub>BAD</sub>  | [SD8] luxAB(Y361*), [SD8] PylRS variant     | P <sub>ProK</sub> | pylT                               | P <sub>C</sub>       | araC        |                      | 4b-c, S5a                |
| pDB059c         | EP (carb <sup>K</sup> )              | SC101   | P <sub>BAD</sub>  | [SD8] luxAB(Y361*)                          | P <sub>C</sub>    | araC                               | -                    | -           |                      | S5b,e-f                  |
| pDB070          | EP (chlor <sup>K</sup> )             | p15A    | P <sub>tet</sub>  | M/TyrRS variant                             | P <sub>ProK</sub> | tyrT <sup>Opt</sup> <sub>CUA</sub> | P <sub>PN25</sub>    | TetR        |                      | 5d, S15, SS18            |
| pTECH-AcK3RS    | EP (chlor <sup>R</sup> )             | p15A    | P <sub>lpp</sub>  | AcK3RS variant                              | P <sub>ProK</sub> | pylT                               | -                    | -           |                      | 4e, S7                   |
| pTECH-PylRS     | EP (chlor <sup>R</sup> )             | p15A    | P <sub>lpp</sub>  | PylRS variant                               | P <sub>ProK</sub> | pylT                               | -                    | -           |                      | 4d, S5c-d, S6, S8-S11    |
| pET28b(+)-sfGFP | EP (Kan <sup>R</sup> )               | pBR322  | P <sub>T7</sub>   | sfGFP-6xHis variant                         | P <sub>I</sub>    | Lacl                               | -                    | -           |                      | 5d, S15, S18             |
| pDB009a         | EP (spec <sup>R</sup> )              | ColE1   | P <sub>tet</sub>  | [SD8] wt T7 RNAP                            | -                 | -                                  | -                    | -           |                      | SF2                      |
| pDB009b         | EP (spec <sup>R</sup> )              | ColE1   | P <sub>tet</sub>  | [SD8] T7 RNAP(S12*)                         | -                 | -                                  | -                    | -           |                      | SF2                      |
| pDB009c         | EP (spec <sup>R</sup> )              | ColE1   | P <sub>tet</sub>  | [SD8] T7 RNAP(S203*)                        | -                 | -                                  | -                    | -           |                      | SF2                      |
| pDB009d         | EP (spec <sup>R</sup> )              | ColE1   | P <sub>tet</sub>  | [SD8] T7 RNAP(S527*)                        | -                 | -                                  | -                    | -           |                      | SF2                      |
| pDB009f         | EP (spec <sup>K</sup> )              | ColE1   | P <sub>tet</sub>  | [SD8] T7 RNAP(S12*, S203*)                  | -                 | -                                  | -                    | -           |                      | SF2                      |
| pDB009g         | EP (spec <sup>K</sup> )              | ColE1   | P <sub>tet</sub>  | [SD8] T7 RNAP(Y250*)                        | -                 | -                                  | -                    | -           |                      | SF2                      |
| pDB009h         | EP (spec <sup>R</sup> )              | ColE1   | P <sub>tet</sub>  | [SD8] T7 RNAP(Y312*)                        | -                 | -                                  | -                    | -           |                      | SF2                      |
| pDB009i         | EP (spec <sup>R</sup> )              | ColE1   | P <sub>tet</sub>  | [SD8] T7 RNAP(Y250*, Y312*)                 | -                 | -                                  | -                    | -           |                      | SF2                      |
| pDB009j         | EP (spec <sup>R</sup> )              | ColE1   | P <sub>tet</sub>  | [SD8] T7 RNAP(S12*, S527*)                  | -                 | -                                  | -                    | -           |                      | SF2                      |

|                    |                          |         |                   |                      |                   |      |   |   |                       |                            |
|--------------------|--------------------------|---------|-------------------|----------------------|-------------------|------|---|---|-----------------------|----------------------------|
| pDB060-Ack3RS      | EP (spec <sup>R</sup> )  | ColE1   | P <sub>pp</sub>   | Ack3RS variant       | P <sub>Prok</sub> | pylT | - | - |                       | S5e                        |
| pDB060-IFRS        | EP (spec <sup>R</sup> )  | ColE1   | P <sub>pp</sub>   | IFRS variant         | P <sub>Prok</sub> | pylT | - | - |                       | S5f                        |
| pDB060-PylRS       | EP (spec <sup>R</sup> )  | ColE1   | P <sub>pp</sub>   | PylRS variant        | P <sub>Prok</sub> | pylT | - | - |                       | S5b                        |
| MP4                | MP (chlor <sup>R</sup> ) | cloDF13 | P <sub>psp</sub>  | dnaQ926, dam, seqA   | P <sub>C</sub>    | araC | - | - | Pyl-2, <i>p</i> -NFRS | 1, 3a, 4a, 5c, S16         |
| SP-Kan             | SP (kan <sup>R</sup> )   | M13 f1  | P <sub>gIII</sub> | Kan                  | -                 | -    | - | - |                       | S4a                        |
| SP-chPylRS         | SP (none)                | M13 f1  | P <sub>gIII</sub> | [SD4] chPyl          | -                 | -    | - | - | Pyl-1                 | 1, 4a, S3b,d               |
| SP-MBP-TEV         | SP (none)                | M13 f1  | P <sub>gIII</sub> | [SD8] MBP-TEV        | -                 | -    | - | - |                       | S4b, S13, S14              |
| SP- <i>p</i> -NFRS | SP (none)                | M13 f1  | P <sub>gIII</sub> | [SD4] <i>p</i> -NFRS | -                 | -    | - | - | <i>p</i> -NFRS        | 1, 3a, 5c, S3a,c, S13, S14 |

The plasmids are categorized by class, antibiotic resistance, origin of replication, and the combination of promoters, ribosome-binding site, and genes. Relevant PACE experiments and figures where these plasmids were used or described are provide.

**Supplementary Note 1.** DNA sequences of genes used in this study.

**a.** DNA sequence of **chPyIRS**. Codons highlighted in gray (Val-31, Thr-56, His-62, and Ala-100) were mutated to 'ATT', 'CCC', 'TAT', and 'GAG', respectively, in the 'IPYE' variant of the enzyme.

```
ATGGATAAGAAGCCGCTGGATGTTCTGATCTCTGCGACCGGTCTGTGGATGTCCCGTACCGGCACG
CTGCACAAGATCAAGCACTATGAGGTTTCTCGTTCTAAAATCTACATCGAAATGGCGTGTGGTGACC
ATCTGGTTGTGAACAACCTCTCGTTCTTGTGCTACCGCACGTGCATTCCGTCATCATAAATACCGTAAA
ACCTGCAAACGTTTGTGCTGTTTCTGACGAAGATATCAACAACCTTCTGACCCGTTTCTACCGAAGGCA
AAACCTCTGTTAAAGTTAAAGTTGTTTCTGCGCCGAAAGTGAAAAAAGCGATGCCGAAATCTGTTTCT
CGTGCGCCGAAACCGCTGGAAAATCCGGTTTCTGCGAAAGCGTCTACCGACACCTCTCGTTCTGTTT
CGTCTCCGGCGAAATCTACCCCGAACTCTCCGGTTCGACCTCTGCAAGTGCCCCCGCACTTACGA
AGAGCCAGACTGACAGGCTTGAAGTCTGTTAAACCCAAAAGATGAGATTTCCCTGAATTCCGGCAA
GCCTTTCAGGGAGCTTGAAGTCCGAATTGCTCTCTCGCAGAAAAAAGACCTGCAGCAGATCTACGCG
GAAGAAAGGGAGAATTATCTGGGGAACTCGAGCGTGAAATTACCAGTTCTTTGTGGACAGGGGTT
TTCTGGAAATAAAATCCCGATCCTGATCCCTCTTGAGTATATCGAAAGGATGGGCATTGATAATGAT
ACCGAACTTTCAAACAGATCTTTCAGGGTTGACAAGAACTTCTGCCTGAGACCCATGCTTGGCTCAA
ACCTTTACAACCTACCTGCGCAAGCTTGACAGGGCCCTGCCTGATCCAATAAAAATTTTTGAAATAGGC
CCATGCTACAGAAAAGAGTCCGACGGCAAAGAACACCTCGAAGAGTTTACCATGCTGAACTTCTGCC
AGATGGGATCGGGATGCACACGGGAAAATCTTGAAAGCATAATTACGGACTTCTGAACCACCTGG
GAATTGATTTCAAGATCGTAGGCGATTCTGCATGGTCTATGGGGATACCCTTGATGTAATGCACGG
AGACCTGGAACCTTCTCTGCAGTAGTCGGACCCATACCGCTTGACCGGGAATGGGGTATTGATAAA
CCCTGGATAGGGGAGGTTTCGGACTCGAACGCCTTCTAAAGTTAAACACGACTTTAAAATATCA
AGAGAGCTGCAAGGTCCGAGTCTTACTATAACGGGATTTCTACCAACCTGTAA
```

**b.** DNA sequence of **MbPyIRS**. Codons highlighted in gray (Val-31, Thr-56, His-62, and Ala-100) were mutated to 'ATT', 'CCC', 'TAT', and 'GAG', respectively, in the 'IPYE' variant of the enzyme.

```
ATGGATAAGAAGCCGCTGGATGTTCTGATCTCTGCGACCGGTCTGTGGATGTCCCGTACCGGCACG
CTGCACAAGATCAAGCACTATGAGGTTTCTCGTTCTAAAATCTACATCGAAATGGCGTGTGGTGACC
ATCTGGTTGTGAACAACCTCTCGTTCTTGTGCTACCGCACGTGCATTCCGTCATCATAAATACCGTAAA
ACCTGCAAACGTTTGTGCTGTTTCTGACGAAGATATCAACAACCTTCTGACCCGTTTCTACCGAAGGCA
AAACCTCTGTTAAAGTTAAAGTTGTTTCTGCGCCGAAAGTGAAAAAAGCGATGCCGAAATCTGTTTCT
CGTGCGCCGAAACCGCTGGAAAATCCGGTTTCTGCGAAAGCGTCTACCGACACCTCTCGTTCTGTTT
CGTCTCCGGCGAAATCTACCCCGAACTCTCCGGTTCGACCTCTGCGCCGGCGCCGCTCTGACCC
GTTCTCAGCTGGATCGTGTGAAAGCGCTGCTGTCTCCGGAAGATAAAATCTCTCTGAACATCGCGAA
ACCGTTCCGTGAACTGGAATCTGAACTGGTTACCCGTCGTAAAAACGATTTCCAGCGTCTGTACACC
AACGATCGTGAAGACTACCTGGGTAACCTGGAACGTGACATCACCAAATTTCTCGTTGACCGTGATT
TCCTGGAAATCAAATCTCCGATCCTGATCCCGGCGGAATACGTTGAACGTATGGGTATCAACAACGA
TACCGAAGTGTCTAAACAGATCTTCCGTGTTGATAAAAACCTGTGCCTGCGTCCGATGCTGGCGCCG
ACCCTGTACAACCTATCTGCGTAAACTGGATCGTATCCTGCCGGACCCGATCAAAAATCTTCAAGTTG
GTCCGTGCTACCGTAAAGAATCTGACGGTAAAGAACACCTGGAAGAGTTCACCATGGTGAACCTTCTG
CCAGATGGGTTTCTGGTTGCACCCGTGAGAACCTGGAATCTCTGATCAAAGAATTTCTGGACTACCTG
GAAATCGACTTCGAAATCGTTGGTGAACCTGCTGCATGGTGTACGGTGATACCCTGGACATCATGCACG
GTGACCTGGAACCTGCTTCTGCGGTTGTTGGTCCGGTTCGCTGGATCGTGAATGGGGTATCGACA
AACCGTGGATCGGTGCGGTTTTCGGTCTGGAACGTCTGCTGAAAGTTATGCACGGTTTTCAAAAACAT
CAAACGTGCGTCTCGTTCTGAATCTTACTACAACGGTATCTCTACCAACCTGTAA
```

c. DNA sequence of **MmPylRS**. Codons highlighted in gray (Val-31, Thr-56, His-62, and Ala-100) were mutated to 'ATT', 'CCC', 'TAT', and 'GAG', respectively, in the 'IPYE' variant of the enzyme.

```
ATGGATAAAAAACCACTAAACACTCTGATATCTGCAACCGGGCTCTGGATGTCCAGGACCGGAACAA
TTCATAAAATAAAACACCACGAAGTCTCTCGAAGCAAATCTATATTGAAATGGCATGCGGAGACCAC
CTTGTTGTAAACAACCTCCAGGAGCAGCAGGACTGCAAGAGCGCTCAGGCACCACAAATACAGGAAG
ACCTGCAAACGCTGCAGGGTTTCGGATGAGGATCTCAATAAGTTCCTCACAAAGGCAAACGAAGACC
AGACAAGCGTAAAGTCAAGGTCGTTTCTGCCCTACCAGAACGAAAAAGGCAATGCCAAAATCCGT
TGCGAGAGCCCCGAAACCTCTTGAGAATACAGAAGCGGCACAGGCTCAACCTTCTGGATCTAAATTT
TCACCTGCGATACCGGTTTCCACCCAAGAGTCAGTTTCTGTCCCGGCATCTGTTTCAACATCAATATC
AAGCATTCTACAGGAGCAACTGCATCCGCACTGGTAAAAGGGAATACGAATCCCATTACATCCATG
TCTGCCCTGTTTCAGGCAAGTGCCCCGCACTTACGAAGAGCCAGACTGACAGGCTTGAAGTCCTG
TTAAACCCAAAAGATGAGATTTCCCTGAATTCGGCAAGCCTTTCAGGGAGCTTGAGTCCGAATTGC
TCTCTCGCAGAAAAAAGACCTGCAGCAGATCTACGCGGAAGAAAGGGAGAATTATCTGGGGAAACT
CGAGCGTGAAATTACAGGTTCTTTGTGGACAGGGGTTTTCTGGAAATAAAATCCCCGATCCTGATC
CCTCTTGAGTATATCGAAAGGATGGGCATTGATAATGATACCGAACTTTCAAAACAGATCTTCAGGGT
TGACAAGAACTTCTGCCTGAGACCCATGCTTGTCTCAAACCTTACAACCTGCGCAAGCTTGAC
AGGGCCCTGCCTGATCCAATAAAAATTTTTGAAATAGGCCATGCTACAGAAAAGAGTCCGACGGCA
AAGAACACCTCGAAGAGTTTACCATGCTGAACTTCTGCCAGATGGGATCGGGATGCACACGGGAAA
ATCTTGAAAGCATAATTACGGACTTCTGAACCACCTGGGAATTGATTTCAAGATCGTAGGCGATTCC
TGCATGGTCTATGGGGATACCCTTGATGTAATGCACGGAGACCTGGAACCTTCTCTGCAGTAGTCG
GACCCATACCGCTTGACCGGGAATGGGGTATTGATAAACCTGGATAGGGGCAGTTTTCGGGCTCG
AACGCCTTCTAAAGTTAAACACGACTTTAAAAATATCAAGAGAGCTGCAAGGTCCGAGTCTTACTAT
AACGGGATTTCTACCAACCTGTAA
```

d. DNA sequence of **chAcK3RS**. Codons highlighted in gray (Val-31, Thr-56, His-62, and Ala-100) were mutated to 'ATT', 'CCC', 'TAT', and 'GAG', respectively, in the 'IPYE' variant of the enzyme.

```
ATGGATAAGAAGCCGCTGGATGTTCTGATCTCTGCGACCGGTCTGTGGATGTCCCGTACCGGCACG
CTGCACAAGATCAAGCACTATGAGGTTTCTCGTTCTAAAATCTACATCGAAATGGCGTGTGGTGACC
ATCTGGTTGTGAACAACCTCTCGTTCTTGTGCTACCGCACGTGCATTCCGTCATCATAAATACCGTAAA
ACCTGCAAACGTTTGTGCTGTTTCTGGTGAAGATATCAACAACCTTCTGACCCGTTTCTACCGAAGGCA
AAACCTCTGTAAAGTTAAAGTTGTTTCTGCGCCGAAAGTAAAAAAGCGATGCCGAAATCTGTTTCT
CGTGCGCCGAAACCGCTGGAAAATCCGGTTTCTGCGAAAGCGTCTACCGACACCTCTCGTTCTGTTT
CGTCTCCGGCGAAATCTACCCCGAACTCTCCGGTTCCGACCTCTGCAAGTGCCCCCGCACTTACGA
AGAGCCAGACTGACAGGCTTGAAGTCCTGTTAAACCCAAAAGATGAGATTTCCCTGAATTCGGCAA
GCCTTTCAGGGAGCTTGAAGTCCGAATTGCTCTCTCGCAGAAAAAAGACCTGCAGCAGATCTACGCG
GAAGAAAGGGAGAATTATCTGGGGAAACTCGAGCGTGAATTAACAGGTTCTTTGTGGACAGGGGTT
TTCTGGAAATAAAATCCCCGATCCTGATCCCTCTTGAGTATATCGAAAGGATGGGCATTGATAATGAT
ACCGAACTTTCAAACAGATCTTCAGGGTTGACAAGAACTTCTGCCTGAGACCCATGATGGCTCCAA
ACATTTTTAACTACGCTCGCAAGCTTGACAGGGCCCTGCCTGATCCAATAAAAATTTTTGAAATAGGC
CCATGCTACAGAAAAGAGTCCGACGGCAAAGAACACCTCGAAGAGTTTACCATGCTGAACTTCTTTC
AGATGGGATCGGGATGCACACGGGAAAATCTTGAAAGCATAATTACGGACTTCTGAACCACCTGG
GAATTGATTTCAAGATCGTAGGCGATTCTGCTATGGGGATACCCTTGATGTAATGCACGG
AGACCTGGAACCTTCTCTGCTGAGTAGTCGGACCCATACCGCTTGACCGGGAATGGGGTATTGATAAA
CCCTGGATAGGGGCAGTTTTCGGACTCGAACGCCTTCTAAAGTTAAACACGACTTTAAAAATATCA
AGAGAGCTGCAAGGTCCGAGTCTTACTATAACGGGATTTCTACCAACCTGTAA
```



e. DNA sequence of **MbAcK3RS**. Codons highlighted in gray (Val-31, Thr-56, His-62, and Ala-100) were mutated to 'ATT', 'CCC', 'TAT', and 'GAG', respectively, in the 'IPYE' variant of the enzyme.

ATGGATAAGAAGCCGCTGGATGTTCTGATCTCTGCGACCGGTCTGTGGATGTCCCCTACCGGCACG  
CTGCACAAGATCAAGCACTATGAGGTTTCTCGTTCTAAAATCTACATCGAAATGGCGTGTGGTGACC  
ATCTGGTTGTGAACAACCTCTCGTTCTTGTGCTACCGCACGTGCATTCCGTCATCATAAATACCGTAAA  
ACCTGCAAACGTTGTCGTGTTTCTGGTGAAGATATCAACAACCTTCTGACCCGTTCTACCGAAGGCA  
AAACCTCTGTTAAAGTTAAAGTTGTTTCTGCGCCGAAAGTAAAAAAGCGATGCCGAAATCTGTTTCT  
CGTGCGCCGAAACCGCTGGAAAATCCGGTTTCTGCGAAAGCGTCTACCGACACCTCTCGTTCTGTTCT  
CGTCTCCGGCGAAATCTACCCCGAACTCTCCGGTTCGACCTCTGCGCCGGCGCCGCTCTGACCC  
GTTCTCAGCTGGATCGTGTTGAAGCGCTGCTGTCTCCGGAAGATAAAATCTCTCTGAACATCGCGAA  
ACCGTTCCGTGAACCTGGAATCTGAACTGGTTACCCGTCGTAAAAACGATTTCCAGCGTCTGTACACC  
AACGATCGTGAAGACTACCTGGGTAACTGGAACGTGACATCACCAAATCTTTCGTTGACCGTGATT  
TCCTGGAAATCAAATCTCCGATCCTGATCCCGCGGAATACGTTGAACGTATGGGTATCAACAACGA  
TACCGAAGTCTAAACAGATCTTCCGTGTTGATAAAAAACCTGTGCCTGCGTCCGATGATGGCGCCG  
ACCATTTTTAACTATGCTCGTAACTGGATCGTATCCTGCCGACCCGATCAAAAATCTTCAAGTTGG  
TCCGTGCTACCGTAAAGAATCTGACGGTAAAGAACACCTGGAAGAGTTCACCAATGGTGAACCTCTTT  
CAGATGGTTCTGGTTGCACCCGTCGAGAACCTGGAATCTCTGATCAAAGAATTTCTGGACTACCTGG  
AAATCGACTTCGAAATCGTTGGTGAACCTGTCATGGTGTACGGTGTACCCCTGGACATCATGCACGG  
TGACCTGGAACCTGCTTCTGCGGTTGTTGGTCCGGTTCGCTGGATCGTGAATGGGGTATCGACAAA  
CCGTGGATCGGTGCGGGTTTCGGTCTGGAACGTCTGCTGAAAGTTATGCACGGTTTCAAAAACATCA  
AACGTGCGTCTCGTTCTGAATCTTACTACAACGGTATCTCTACCAACCTGTAA

f. DNA sequence of **MmAcK3RS**. Codons highlighted in gray (Val-31, Thr-56, His-62, and Ala-100) were mutated to 'ATT', 'CCC', 'TAT', and 'GAG', respectively, in the 'IPYE' variant of the enzyme.

ATGGATAAAAAACCACTAAACACTCTGATATCTGCAACCGGGCTCTGGATGTCCAGGACCGGAACAA  
TTCATAAATAAAACACCACGAAGTCTCTCGAAGCAAAATCTATATTGAAATGGCATGCCGAGACCAC  
CTTGTGTAAACAACCTCCAGGAGCAGCAGGACTGCAAGAGCGCTCAGGCACCACAAATACAGGAAG  
ACCTGCAAACGCTGCAGGGTTTCGGGTGAGGATCTCAATAAGTTCCCTCACAAAGGCAACGAAGAC  
CAGACAAGCGTAAAAGTCAAGGTCGTTTCTGCCCTACCAGAACGAAAAGGCAATGCCAAAATCCG  
TTGCGAGAGCCCCGAAACCTCTTGAGAATACAGAAGCGGCACAGGCTCAACCTTCTGGATCTAAATT  
TTCACCTGCGATACCGGTTTCCACCCAAGAGTCAAGTTTCTGTCCCGGCATCTGTTTCAACATCAATAT  
CAAGCATTCTACAGGAGCAACTGCATCCGCACTGGTAAAAGGGAATACGAATCCCATTACATCCAT  
GTCTGCCCTGTTCAAGCAAGTGCCCCCGCACTTACGAAGAGCCAGACTGACAGGCTTGAAGTCTT  
GTAAACCCAAAAGATGAGATTTCCCTGAATTCGGCAAGCCTTTCAGGGAGCTTGAGTCCGAATTG  
CTCTCTCGCAGAAAAAAGACCTGCAGCAGATCTACGCGGAAGAAAGGAGAATTATCTGGGGAAA  
CTCGAGCGTGAATTACCAGGTTCTTTGTGGACAGGGTTTTCTGGAAATAAAATCCCCGATCCTGA  
TCCCTCTTGAGTATATCGAAAGGATGGGCATTGATAATGATACCGAACTTTCAAAACAGATCTTCAGG  
GTTGACAAGAACTTCTGCCTGAGACCCATGATGGCTCAAACATTTTTAACTACGCTCGCAAGCTTGA  
CAGGGCCCTGCCTGATCCAATAAAAATTTTTGAAATAGGCCCATGCTACAGAAAAGAGTCCGACGGC  
AAAGAACACCTCGAAGAGTTTACCATGCTGAACTTCTTTCAGATGGGATCGGGATGCACACGGGAAA  
ATCTTGAAAGCATAATTACGGACTTCTGAACCACCTGGGAATTGATTTCAAGATCGTAGGCGATTCC  
TGCATGGTCTATGGGGATACCCTTGTGTAATGCACGGAGACCTGGAACCTTCTCTGCAGTAGTCCG  
GACCCATACCGCTTGACCGGGAATGGGGTATTGATAAACCTGGATAGGGGCAGGTTTTCGGGCTCG  
AACGCCTTCTAAAGGTTAAACACGACTTTAAAAATATCAAGAGAGCTGCAAGGTCCGAGTCTTACTAT  
AACGGGATTTCTACCAACCTGTAA

**g.** DNA sequence of **chIFRS**. Codons highlighted in gray (Val-31, Thr-56, His-62, and Ala-100) were mutated to 'ATT', 'CCC', 'TAT', and 'GAG', respectively, in the 'IPYE' variant of the enzyme.

```
ATGGATAAGAAGCCGCTGGATGTTCTGATCTCTGCGACCGGTCTGTGGATGTCCCGTACCGGCACG
CTGCACAAGATCAAGCACTATGAGGTTTCTCGTTCTAAAATCTACATCGAAATGGCGTGTGGTGACC
ATCTGGTTGTGAACAACCTCTCGTTCTTGTCTGACCGCACGTGCATTCCGTCATCATAAATACCGTAAA
ACCTGCAAACGTTGTCGTGTTTCTGACGAAGATATCAACAACCTTCTGACCCGTTCTACCGAAGGCA
AAACCTCTGTTAAAGTTAAAGTTGTTTCTGCGCCGAAAGTAAAAAAGCGATGCCGAAATCTGTTTCT
CGTGCGCCGAAACCGCTGGAAAATCCGGTTTCTGCGAAAGCGTCTACCGACACCTCTCGTTCTGTTT
CGTCTCCGGCGAAATCTACCCCGAACTCTCCGGTTCCGACCTCTGCAAGTGCCCCCGCACTTACGA
AGAGCCAGACTGACAGGCTTGAAGTCTGTTAAACCCAAAAGATGAGATTTCCCTGAATTCCGGCAA
GCCTTTCAGGGAGCTTGAGTCCGAATTGCTCTCTCGCAGAAAAAAGACCTGCAGCAGATCTACGCG
GAAGAAAGGGAGAATTATCTGGGGAACTCGAGCGTGAATTACCAGGTTCTTTGTGGACAGGGGTT
TTCTGGAAATAAAATCCCGGATCCTGATCCCTCTTGAGTATATCGAAAGGATGGGCATTGATAATGAT
ACCGAACTTTCAAACAGATCTTCAGGGTTGACAAGAACTTCTGCCTGAGACCCATGCTTCTGCTCAA
ACCTTTACAACCTACCTGCGCAAGCTTGACAGGGCCCTGCCTGATCCAATAAAAAATTTTTGAAATAGGC
CCATGCTACAGAAAAGAGTCCGACGGCAAAGAACACCTCGAAGAGTTTACCATGCTGTCGTTTATTCC
AGATGGGATCGGGATGTACACGGGAAAATCTTGAAAGCATAATTACGGACTTCTGAACCACCTGGG
AATTGATTTCAAGATCGTAGGCGATTCTGCATGGTCTATGGGGATACCCTTGATGTAATGCACGGA
GACCTGGAACCTTCTCTGCAGTAGTCGGACCCATACCGCTTGACCGGGAATGGGGTATTGATAAAC
CCTGGATAGGGGCAGGTTTTCGGGCTCGAACGCCTTCTAAAGTTAAACACGACTTTAAAAATATCAA
GAGAGCTGCAAGGTCCGAGTCTTACTATAACGGGATTTCTACCAACCTGTAA
```

**h.** DNA sequence of PACE-evolved chPylRS variant, **Split1**. The in-frame, premature stop codon of the split enzyme is highlighted in yellow, and the position of translational reinitiation, corresponding to Met-107 of chPylRS, is highlighted in blue. In the **Split1** variant, codons highlighted in gray were reverted back to 'GTT', 'ACC', 'CAT', and 'GCG', respectively.

```
ATGGATAAGAAGCCGCTGGATGTTCTGATCTCTGCGACCGGTCTGTGGATGTCCCGTACCGGCACG
CTGCACAAGATCAAGCACTATGAGATTTCTCGTTCTAAAATCTACATCGAAATGGCGTGTGGTGACCA
TCTGGTTGTGAACAACCTCTCGTTCTTGTCTGACCGCACGTGCATTCCGTTATCATAAATACCGTAAAA
CCTGCAAACGTTGTCGTGTTTCTGACGAAGATATCAACAACCTTCTGACCCGTTCTACCGAAGGCAA
AACCTCTGTTAAAGTTAAAGCTGTTCTGAGCCGAAAGTGAATAAAGCGATGCCGAAATCTGTTTCTCG
TGCGCCGAAACCGCTGGAAAATCCGGTTTCTGCGAAAGCGTCTACCGACACCTCTCGTTCTGTTCCG
TCTCCGGCGAAATCTACCCCGAACTCTCCGGTTCCGACCTCTGCAAGTGCCCCCGCACTTACGAAG
AGCCAGACTGACAGGCTTGAAGTCTGTTAAACCCAAAAGATGAGATTTCCCTGAATTCCGGCAAGC
CTTTCAGGGAGCTTGAGTCCGAATTGCTCTCTCGCAGAAAAAAGACCTGCAGCAGATCTACGCGGA
AGAAAGGGAGAATTATCTGGGGAACTCGAGCGTGAATTACCAGGTTCTTTGTGGACAGGGGTTTT
CTGGAAATAAAATCCCGGATCCTGATCCCTCTTGAGTATATCGAAAGGATGGGCATTGATAATGATAC
CGAACTTTCAAACAGATCTTCAGGGTTGACAAGAACTTCTGCCTGAGACCCATGCTTCTGCTCAAAC
CTTTACAACCTACCTGCGCAAGCTTGACAGGGCCCTGCCTGATCCAATAAAAAATTTTTGAAATAGGCC
ATGCTACAGAAAAGAGTCCGACGGCAAAGAACACCTCGAAGAGTTTACCATGCTGAACTTCTGCCAG
ATGGGATCGGGATGCACACGGGAAAATCTTGAAAGCATAATTACGGACTTCTGAACCACCTGGGAA
TTGATTTCAAGATCGTAGGCGATTCTGCATGGTCTATGGGGATACCCTTGATGTAATGCACGGAGA
CCTGGAACCTTCTCTGCAGTAGTCGGACCCATACCGCTTGACCGGGAATGGGGTATTGATAAACCC
TGGATAGGGGCAGGTTTTCGGGCTCGAACGCCTTCTAAAGTTAAACACGACTTTAAAAATATCAAGA
GAGCTGCAAGGTCCGAGTCTTACTATAACGGGATTTCTACCAACCTGTAA
```

i. DNA sequence of PACE-evolved chPylRS variant, **Split2**. The in-frame, premature stop codon of the split enzyme is highlighted in yellow, and the position of translational reinitiation, corresponding to Met-107 of chPylRS, is highlighted in blue. In the **Split2'** variant, codons highlighted in gray were reverted back to 'GTT', 'ACC', 'CAT', and 'GCG', respectively.

```
ATGGATAAGAAGCCGCTGGATGTTCTGATCTCTGCGACCGGTCTGTGGATGTCCCGTACCGGCACG
CTGCACAAGATCAAGCACTATGAGATTTCTCGTTCTAAAATCTACATCGAAATGGCGTGTGGTGACCA
TCTGGTTGTGAACAACCTCTCGTTCTTGTCTGCGTCCCGCACGTGCATTCCGTTATCATAAATACCGTAAAA
CCTGCAAACGTTGTCGTGTTTCTGACGAAGATATCAACAACCTTCTGACCCGTTCTACCGAAGGCAA
AACCTCTGTTAAAGTTAAAGTTGTTCTGAGCCGAAAGTGA107AAAAAGCGATGCCGAAATCTGTTTCTCG
TGCGCCGAAACCGCTGGAAAATCCGGTTTCTGCGAAAGCGTCTACCGACACCTCTCGTTCTGTTCCG
TCTCCGGCGAAATCTACCCCGAACTCTCCGGTCCGACCTCTGCAAGTGCCCCCGCACTTACGAAG
AGCCAGACTGACAGGCTTGAAGTCTGTTAAACCCAAAAGATGAGATTTCCCTGAATTCGGCAAGC
CTTTCAGGGAGCTTGAGTCCGAATTGCTCTCTCGCAGAAAAAAGACCTGCAGCAGATCTACGCGGA
AGAAAGGGAGAATTATCTGGGGAAACTCGAGCGTGAAATTACCAGGTTCTTTGTGGACAGGGGTTTT
CTGGAATAAAAATCCCGATCCTGATCCCTCTTGAGTATATCGAAAGGATGGGCATTGATAATGATAC
CGAATTTCAAACAGATCTTCAGGGTTGACAAGAACTTCTGCCTGAGACCCATGCTTGCTCCAAC
CTTTACAACCTACCTGCGCAAGCTTGACAGGGCCCTGCCTGATCCAATAAAAATTTTTGAAATAGGCC
ATGCTACAGAAAAGAGTCCGACGGCAAAGAACACCTCGAAGAGTTTACCATGCTGAACTTCTGCCAG
ATGGGATCGGGATGCACACGGGAAAATCTTGAAAGCATAATTACGGACTTCTGAACCACCTGGGAA
TTGATTTCAAGATCGTAGGCGATTCTGCATGGTCTATGGGGATACCCTTGATGTAATGCACGGAGA
CCTGGAATTTCTCTGCAGTAGTCGGACCCATACCGCTTGACCGGGAATGGGGTATTGATAAACCC
TGGATAGGGGCAGTTTTCGGGCTCGAACGCCTTCTAAAGTTAAACACGACTTTAAAATATCAAGA
GAGCTGCAAGGTCCGAGTCTTACTATAACGGGATTTCTACCAACCTGTAA
```

j. DNA sequence of PACE-evolved chPylRS variant, **Split3**. The in-frame, premature stop codon of the split enzyme is highlighted in yellow, and the position of translational reinitiation, corresponding to Met-107 of chPylRS, is highlighted in blue. In the **Split3'** variant, codons highlighted in gray or underlined were reverted back to 'GTT', 'ACC', 'CAT', and 'GCG', respectively.

```
ATGGATAAGAAGCCGCTGGATGTTCTGATCTCTGCGACCGGTCTGTGGATGTCCCGTACCGGCACG
CTGCACAAGATCAAGCACTATGAGATTTCTCGTTCTAAAATCTACATCGAAATGGCGTGTGGTGACCA
TCTGGTTGTGAACAACCTCTCGTTCTTGTCTGCGTCCCGCACGTGCATTCCGTTATCATAAATACCGTAAAA
CCTGCAAACGTTGTCGTGTTTCTGACGAAGATATCAACAACCTTCTGACCCGTTCTACCGAAGGCAA
AACCTCTGTTAAAGTTAAAGTTGTTTTCTGAGCCGAAAGTGAAAAAGCGATGCCGAAATCTGTTTCT
CGTGCGCCGAAACCGCTGGAAAATCCGGTTTCTGCGAAAGCGTCTACCGACACCTCTCGTTCTGTTCC
CGTCTCCGGCGAAATCTACCCCGAACTCTCCGGTCCGACCTCTGCAAGTGCCCCCGCACTTACGA
AGAGCCAGACTGACAGGCTTGAAGTCTGTTAAACCCAAAAGATGAGATTTCCCTGAATTCGGCAA
GCCTTTCAGGGAGCTTGAGTCCGAATTGCTCTCTCGCAGAAAAAAGACCTGCAGCAGATCTACGCG
GAAGAAAGGGAGAATTATCTGGGGAAACTCGAGCGTGAAATTACCAGGTTCTTTGTGGACAGGGGTT
TTCTGGAATAAAAATCCCGATCCTGATCCCTCTTGAGTATATCGAAAGGATGGGCATTGATAATGAT
ACCGAATTTCAAACAGATCTTCAGGGTTGACAAGAACTTCTGCCTGAGACCCATGCTTGCTCCA
ACCTTTACAACCTACCTGCGCAAGCTTGACAGGGCCCTGCCTGATCCAATAAAAATTTTTGAAATAGGC
CCATGCTACAGAAAAGAGTCCGACGGCAAAGAACACCTCGAAGAGTTTACCATGCTGAACTTCTGCC
AGATGGGATCGGGATGCACACGGGAAAATCTTGAAAGCATAATTACGGACTTCTGAACCACCTGG
GAATTGATTTCAAGATCGTAGGCGATTCTGCATGGTCTATGGGGATACCCTTGATGTAATGCACGG
AGACCTGGAATTTCTCTGCAGTAGTCGGACCCATACCGCTTGACCGGGAATGGGGTATTGATAAA
CCCTGGATAGGGGCAGTTTTCGGGCTCGAACGCCTTCTAAAGTTAAACACGACTTTAAAATATCA
AGAGAGCTGCAAGGTCCGAGTCTTACTATAACGGGATTTCTACCAACCTGTAA
```

k. DNA sequence of PACE-evolved chPylRS variant, **Split4**. The in-frame, premature stop codon of the split enzyme is highlighted in yellow, and the position of translational reinitiation, corresponding to Met-107 of chPylRS, is highlighted in blue. In the **Split4'** variant, codons highlighted in gray were reverted back to 'GTT', 'ACC', 'CAT', and 'GCG', respectively.

```
ATGGATAAGAAGCCGCTGGATGTTCTGATCTCTGCGACCGGTCTGTGGATGTCCCGTACCGGCACG
CTGCACAAGATCAAGCACTATGAGATTTCTCGTTCTAAAATCTACATCGAAATGGCGTGTGGTGACCA
TCTGGTTGTGAACAACCTCTCGTTCTTGTGCGTCCCGCACGTGCATTCCGTTATCATAAATACCGTAAAA
CCTGCAAACGTTGTCGTGTTTCTGACGAAGATATCAACAACCTTCTGACCCGTTCTACCGAAGGCTA
AACCTCTGTTAAAGTTAAAGTTGTTTCTGAGCCGAAAGTGAAAAAGCGATGCCGAAATCTGTTTCTC
GTGCGCCGAAACCGCTGGAAAATCCGGTTTCTGCGAAAGCGTCTACCGACACCTCTCGTTCTGTTCC
GTCTCCGGCGAAATCTACCCCGAACTCTCCGGTCCGACCTCTGCAAGTGCCCCCGCACTTACGAA
GAGCCAGACTGACAGGCTTGAAGTCCTGTTAAACCCAAAAGATGAGATTTCCCTGAATTCGGGCAAG
CCTTTCAGGGAGCTTGAGTCCGAATTGCTCTCTCGCAGAAAAAAGACCTGCAGCAGATCTACGCGG
AAGAAAGGGAGAATTATCTGGGGAAACTCGAGCGTGAAATTACCAGGTTCTTTGTGGACAGGGTTTT
TCTGAAATAAAATCCCGATCCTGATCCCTCTTGAGTATATCGAAAGGATGGGCATTGATAATGATA
CCGAACCTTTCAAACAGATCTTCAGGGTTGACAAGAACTTCTGCCTGAGACCCATGCTTGCTCCAAA
CCTTTACAACCTACCTGCGCAAGCTTGACAGGGCCCTGCCTGATCCAATAAAAATTTTTGAAATAGGCC
CATGCTACAGAAAAGAGTCCGACGGCAAAGAACACCTCGAAGAGTTTACCATGCTGAACTTCTGCCA
GATGGGATCGGGATGCACACGGGAAAATCTTGAAAGCATAATTACGGACTTCTGAACCACCTGGG
AATTGATTTCAAGATCGTAGGCGATTCTGCATGGTCTATGGGGATACCCTTGATGTAATGCACGGA
GACCTGGAACCTTCTCTGCAGTAGTCGGACCCATACCGCTTGACCGGGAATGGGGTATTGATAAAC
CCTGGATAGGGGCAGTTTTCGGGCTCGAACGCCTTCTAAAGGTTAAACACGACTTTAAAAATATCAA
GAGAGCTGCAAGGTCCGAGTCTTACTATAACGGGATTTCTACCAACCTGTAA
```

l. DNA sequence of PACE-evolved chPylRS variant, **Split5**. The in-frame, premature stop codon of the split enzyme is highlighted in yellow, and the position of translational reinitiation, corresponding to Met-107 of chPylRS, is highlighted in blue. In the **Split5'** variant, codons highlighted in gray were reverted back to 'GTT', 'ACC', 'CAT', and 'GCG', respectively.

```
ATGGATAAGAAGCCGCTGGATGTTCTGATCTCTGCGACCGGTCTGTGGATGTCCCGTACCGGCACG
CTGCACAAGATCAAGCACTATGAGATTTCTCGTTCTAAAATCTACATCGAAATGGCGTGTGGTGACCA
TCTGGTTGTGAACAACCTCTCGTTCTTGTGCGTCCCGCACGTGCATTCCGTTATCATAAATACCGTAAAA
CCTGCAAACGTTGTCGTGTTTCTGACGAAGATATCAACAACCTTCTGACCCGTTCTACCGAAGGCAA
AACCTCTGTTAAAGTTAAAGTTGTTTCTGAGCGAAAAGTGAAAAAAGCGATGCCGAAATCTGTTTCTCG
TGCGCCGAAACCGCTGGAAAATCCGGTTTCTGCGAAAGCGTCTACCGACACCTCTCGTTCTGTTCCG
TCTCCGGCGAAATCTACCCCGAACTCTCCGGTCCGACCTCTGCAAGTGCCCCCGCACTTACGAAG
AGCCAGACTGACAGGCTTGAAGTCCTGTTAAACCCAAAAGATGAGATTTCCCTGAATTCGGGCAAGC
CTTTCAGGGAGCTTGAGTCCGAATTGCTCTCTCGCAGAAAAAAGACCTGCAGCAGATCTACGCGGA
AGAAAGGGAGAATTATCTGGGGAAACTCGAGCGTGAAATTACCAGGTTCTTTGTGGACAGGGTTTT
CTGAAATAAAATCCCGATCCTGATCCCTCTTGAGTATATCGAAAGGATGGGCATTGATAATGATAC
CGAACTTTCAAACAGATCTTCAGGGTTGACAAGAACTTCTGCCTGAGACCCATGCTTGCTCCAAAC
CTTTACAACCTACCTGCGCAAGCTTGACAGGGCCCTGCCTGATCCAATAAAAATTTTTGAAATAGGCC
ATGCTACAGAAAAGAGTCCGACGGCAAAGAACACCTCGAAGAGTTTACCATGCTGAACTTCTGCCAG
ATGGGATCGGGATGCACACGGGAAAATCTTGAAAGCATAATTACGGACTTCTGAACCACCTGGGAA
TTGATTTCAAGATCGTAGGCGATTCTGCATGGTCTATGGGGATACCCTTGATGTAATGCACGGAGA
CCTGGAACCTTCTCTGCAGTAGTCGGACCCATACCGCTTGACCGGGAATGGGGTATTGATAAACCC
TGGATAGGGGCAGTTTTCGGGCTCGAACGCCTTCTAAAGGTTAAACACGACTTTAAAAATATCAAGA
GAGCTGCAAGGTCCGAGTCTTACTATAACGGGATTTCTACCAACCTGTAA
```

m. DNA sequence of PACE-evolved chPylRS variant, **Split6**. This split enzyme contained several in-frame, premature stop codons (highlighted in yellow) between the frameshift and the position of translational reinitiation, corresponding to Met-107 of chPylRS highlighted in blue. In the **Spit6'** variant, codons highlighted in gray or underlined were reverted back to 'GTT', 'ACC', 'CAT', and 'GCG', respectively.

ATGGATAAGAAGCCGCTGGATGTTCTGATCTCTGCGACCGGTCTGTGGATGTCCCGTACCGGCACG  
CTGCACAAGATCAAGCACTATGAGATTTCTCGTTCTAAAATCTACATCGAAATGGCGTGTGGTGACCA  
TCTGGTTGTGAACAACCTCTCGTTCTTGTCTGCGACCGTGCATTCCGTTATCATAAATACCGTAAAA  
CCTGCAAACGTTGTCGTGTTTCTGACGAAGATATCAACAACCTTCTGACCCGTTCTACCGAAGGCAA  
AACCTCTGTTAAAGTTAAAGTTGTTTCTGAGCCGAAAGTAAAAAAGCGATGCCGAAATCTGTTTCT  
CGTGCGCCGAAACCGCTGGAAAATCCGGTTTCTGCGAAAGCGTCTACCGACACCTCTCGTTCTGTTT  
CGTCTCCGGCGAAATCTACCCGAACTCTCCGGTTCCGACCTCTGCAAGTGCCCCCGCACTTACGA  
AGAGCCAGACTGACAGGCTTGAAGTCTGTTAAACCCAAAAGATGAGATTTCCCTGAATTCGGCAA  
GCCTTTCAGGGAGCTTGAGTCCGAATTGCTCTCTCGCAGAAAAAAGACCTGCAGCAGATCTACGCG  
GAAGAAAGGGAGAAATTATCTGGGGAAACTCGAGCGTGAAATTACCAGTTCTTTGTGGACAGGGGTT  
TTCTGGAAATAAAATCCCCGATCCTGATCCCTTTGAGTATATCGAAAGGATGGGCATTGATAATGAT  
ACCGAACTTTCAAACAGATCTTCAGGGTTGACAAGAATTCTGCCTGAGACCCATGCTTGCTCCAA  
ACCTTTACAACCTACCTGCGCAAGCTTGACAGGGCCCTGCCTGATCCAATAAAATTTTTGAAATAGGC  
CCATGCTACAGAAAAGAGTCCGACGGCAAAGAACACCTCGAAGAGTTTACCATGCTGAACTTCTGCC  
AGATGGGATCGGGATGCACACGGGAAAATCTTGAAAGCATAATTACGGACTTCTGAACCACCTGG  
GAATTGATTTCAAGATCGTAGGCGATTCTGCATGGTCTATGGGGATACCCTTGATGTAATGCACGG  
AGACCTGGAACCTTCTCTGCAGTAGTCGGACCCATACCGCTTGACCGGGAATGGGGTATTGATAAA  
CCCTGGATAGGGCAGGTTTCGGGCTCGAACGCCTTCTAAAGGTTAAACACGACTTTAAAAATATCA  
AGAGAGCTGCAAGGTCCGAGTCTTACTATAACGGGATTTCTACCAACCTGTAA

n. DNA sequence of **p-NFRS**.

ATGGACGAATTTGAAATGATAAAGAGAAACACATCTGAAATTATCAGCGAGGAAGAGTTAAGAGAGG  
TTTTAAAAAAGATGAAAATCTGCTCTGATAGGTTTTGAACCAAGTGGTAAAATACATTTAGGGCATT  
ATCTCCAAATAAAAAAGATGATTGATTTACAAAATGCTGGATTTGATATAATTATATTGTTGGCTGATT  
ACACGCCTATTTAAACCAGAAAGGAGAGTTGGATGAGATTAGAAAAATAGGAGATTATAACAAAAAAG  
TTTTTGAAGCAATGGGGTTAAAGGCAAATATGTTTATGGAAGTTTCGTTCCAGCTTGATAAGGATTAT  
ACACTGAATGTCTATAGATTGGCTTTAAAAACTACCTTAAAAAGAGCAAGAAGGAGTATGGAACCTTAT  
AGCAAGAGAGGATGAAAATCCAAAGGTTGCTGAAGTTATCTATCCAATAATGCAGGTTAATCCTCTTA  
ATTATGAGGGCGTTGATGTTGCAGTTGGAGGGATGGAGCAGAGAAAAATACACATGTTAGCAAGGG  
AGCTTTTACCAAAAAAGGTTGTTTGTATTACAACCCTGTCTTAAACGGGTTTGGATGGAGAAGGAAAG  
ATGAGTTCTTCAAAGGGAATTTTATAGCTGTTGATGACTCTCCAGAAGAGATTAGGGCTAAGATAAA  
GAAAGCATACTGCCAGCTGGAGTTGTTGAAGGAAATCCAATAATGGAGATAGCTAAATACTTCTT  
GAATATCCTTTAACCATAAAAAGGCCAGAAAAATTTGGTGGAGATTTGACAGTTAATAGCTATGAGGA  
GTTAGAGAGTTTATTTAAAAATAAGGAATTGCATCCAATGCGCTTAAAAAATGCTGTAGCTGAAGAAC  
TTATAAAGATTTTAGAGCCAATTAGAAAGAGATTATAA

**o. DNA sequence of *p-IFRS*.**

ATGGACGAATTTGAAATGATAAAGAGAAACACATCTGAAATTATCAGCGAGGAAGAGTTAAGAGAGG  
TTTTAAAAAAGATGAAAAATCTGCTCTGATAGGTTTTGAACCAAGTGGTAAAATACATTTAGGGCATT  
ATCTCCAAATAAAAAAGATGATTGATTTACAAAATGCTGGATTTGATATAATTATATTGTTGGCTGATTT  
ACACGCCTATTTAAACCAGAAAGGAGAGTTGGATGAGATTAGAAAAATAGGAGATTATAACAAAAAAG  
TTTTTGAAGCAATGGGGTTAAAGGCAAAATATGTTTATGGAAGTTCGTTCCAGCTTGATAAGGATTAT  
ACACTGAATGTCTATAGATTGGCTTTAAAAACTACCTTAAAAAGAGCAAGAAGGAGTATGGAECTTAT  
AGCAAGAGAGGATGAAAATCCAAAGGTTGCTGAAGTTATCTATCCAATAATGCAGGTTAATCCTCTTC  
ATTATGAGGGCGTTGATGTTGCAGTTGGAGGGATGGAGCAGAGAAAAATACACATGTTAGCAAGGG  
AGCTTTTACCAAAAAAGGTTGTTTGTATTCACAACCCTGTCTTAACGGGTTTGGATGGAGAAGGAAAAG  
ATGAGTTCTTCAAAGGGAATTTTATAGCTGTTGATGACTCTCCAGAAGAGATTAGGGCTAAGATAAA  
GAAAGCATACTGCCAGCTGGAGTTGTTGAAGGAAATCCAATAATGGAGATAGCTAAATACTTCCTT  
GAATATCCTTTAACCATAAAAAGGCCAGAAAAATTTGGTGGAGATTTGACAGTTAATAGCTATGAGGA  
GTTAGAGAGTTTATTTAAAAATAAGGAATTGCATCCAATGCGCTTAAAAAATGCTGTAGCTGAAGAAC  
TTATAAAGATTTTAGAGCCAATTAGAAAGAGATTATAA

p. DNA sequence of **T7 RNAP**. Codons that were mutated to amber stop codons in the course of developing PACE selections are highlighted in yellow (Ser-12, Ser-203, Tyr-250, Tyr-312, and Ser-527).

ATGAACACGATTAACATCGCTAAGAACGACTTC**TCT**GACATCGAACTGGCTGCTATCCCGTTCAACAC  
TCTGGCTGACCATTACGGTGAGCGTTTAGCTCGCGAACAGTTGGCCCTTGAGCATGAGTCTTACGAG  
ATGGGTGAAGCACGCTTCCGCAAGATGTTT**GAGCGTCAACTTAAAGCTGGTGAGGTTGCGGATAAC**  
GCTGCCGCCAAGCCTCTCATCACTACCCTACTCCCTAAGATGATTGCACGCATCAACGACTGGTTTG  
AGGAAGTAAAAGCTAAGCGCGGCAAGCGCCCGACAGCCTTCCAGTTCCTGCAAGAAATCAAGCCGG  
AAGCCGTAGCGTACATCACCATTAAGACCACTCTGGCTTGCCTAACCAGTGCTGACAATACAACCGT  
TCAGGCTGTAGCAAGCGCAATCGGTCCGGCCATTGAGGACGAGGCTCGCTTCGGTTCGTATCCGTGA  
CCTTGAAGCTAAGCACTTCAAGAAAAACGTTGAGGAACAACCTCAACAAGCGCGTAGGGCACGTCTAC  
AAGAAAGCATTATGCAAGTTGTCGAGGCTGACATGCTCTAAGGGTCTACTCGGTGGCGAGGCGT  
GGTCT**TGG**TGGCATAAGGAAGACTCTATTCATGTAGGAGTACGCTGCATCGAGATGCTCATTGAGTC  
AACCGGAATGGTTAGCTTACACCGCCAAAATGCTGGCGTAGTAGGTCAGACTCTGAGACTATCGAA  
CTCGCACCTGAAT**TAC**GCTGAGGCTATCGCAACCCGTGCAGGTGCGCTGGCTGGCATCTCTCCGAT  
TTCCAACCTTGCGTAGTTCCCTAAGCCGTGGACTGGCATTACTGGTGGTGGCTATTGGGCTAACG  
GTCGTGCTCCTCTGGCGCTGGTGCCTACTCACAGTAAGAAAGCACTGATGCGCTACGAAGACGTTT  
**AC**ATGCCTGAGGTGTACAAAGCGATTAACATTGCGCAAAACACCCGCATGGAAAATCAACAAGAAAGT  
CCTAGCGGTGCGCAACGTAATCACCAAGTGGAAGCATTGTCCGGTTCGAGGACATCCCTGCGATTGA  
GCGTGAAGAACTCCCGATGAAACCGGAAGACATCGACATGAATCCTGAGGCTCTCACCGCGTGGAA  
ACGTGCTGCCGCTGCTGTGTACCGCAAGGACAAGGCTCGCAAGTCTCGCCGTATCAGCCTTGAGTT  
CATGCTTGAGCAAGCCAATAAGTTTGCTAACCATTAAGGCCATCTGGTTCCCTTACAACATGGACTGG  
CGCGGTGCTGTTTACGCTGTGTCAATGTTCAACCCGCAAGGTAACGATATGACCAAAGGACTGCTTA  
CGCTGGCGAAAGGTAACCAATCGGTAAGGAAGGTTACTACTGGCTGAAAATCCACGGTGCAAACCT  
GTGCGGGTGTGATAAGGTTCCGTTCCCTGAGCGCATCAAGTTCATTGAGGAAAACCACGAGAACAT  
CATGGCTTGCCTAAGTCTCCACTGGAGAACACTTGGTGGGCTGAGCAAGATTCTCCGTTCTGCTTC  
CTTGCGTTCTGCTTTGAGTACGCTGGGGTACAGCACACGGCCTG**AGC**TATAACTGCTCCCTTCCG  
TGGCGTTTGACGGGTCTTGCTCTGGCATCCAGCACTTCTCCGCGATGCTCCGAGATGAGGTAGGTG  
GTCGCGCGGTTAACTTGCTTCCCTAGTGAAACCGTTCAGGACATCTACGGGATTGTTGCTAAGAAAGT  
CAACGAGATTCTACAAGCAGACGCAATCAATGGGACCGATAACGAAGTAGTTACCGTGACCGATGAG  
AACACTGGTGAATCTCTGAGAAAGTCAAGCTGGGCACTAAGGCACTGGCTGGTCAATGGCTGGCT  
TACGGTGTACTCGCAGTGTGACTAAGCGTTCAGTCATGACGCTGGCTTACGGGTCCAAAGAGTTCCG  
GCTTCCGTCAACAAGTGCTGGAAGATAACATTAGCCAGCTATTGATTCCGGCAAGGGTCTGATGTT  
CACTCAGCCGAATCAGGCTGCTGGATAACATGGCTAAGCTGATTTGGGAATCTGTGAGCGTGACGGT  
GGTAGCTGCGGTTGAAGCAATGAAGTGGCTTAAGTCTGCTGCTAAGCTGCTGGCTGCTGAGGTCAA  
AGATAAGAAGACTGGAGAGATTCTTCGCAAGCGTTGCGCTGTGCATTGGGTAACCTCCTGATGGTTTC  
CCTGTGTGGCAGGAATACAAGAAGCCTATTCAGACGCGCTTGAACCTGATGTTCCCTCGGTGAGTTCC  
GCTTACAGCCTACCATTAACACCAACAAGATAGCGAGATTGATGCACACAAACAGGAGTCTGGTAT  
CGCTCCTAACTTTGTACACAGCCAAGACGGTAGCCACCTTCGTAAGACTGTAGTGTGGGCACACGA  
GAAGTACGGAATCGAATCTTTTGCCTGATTACGACTCCTTCGGTACCATTCCGGCTGACGCTGCG  
AACCTGTTCAAAGCAGTGCGCGAAACTATGGTTGACACATATGAGTCTTGTGATGTACTGGCTGATTT  
CTACGACCGATTGCTGACCGATTGCACGAGTCTCAATTGGACAAAATGCCAGCACTTCCGGCTAAA  
GGTAACCTGAACCTCCGTGACATCTTAGAGTCGGACTTCGCGTTCCGCTAA

q. DNA sequence of **gene III**. Codons that were mutated to amber stop codons in the course of developing PACE selections are highlighted in yellow (Pro-29, Pro-83, Thr-177, and Tyr-184).

ATGAAAAAATTATTATTCGCAATTCCTTTAGTTGTTCCCTTTCTATTCTCACTCCGCTGAAACTGTTGAAA  
GTTGTTTAGCAAAA**CCC**CATACAGAAAATTCATTTACTAACGTCTGGAAAGACGACAAAACCTTTAGAT  
CGTTACGCTAACTATGAGGGCTGTCTGTGGAATGCTACAGGCGTTGTAGTTTGTACTGGTGACGAAA  
CTCAGTGTTACGGTACATGGGTTCCCTATTGGGCTTGCTATC**CCT**GAAAATGAGGGTGGTGGCTCTGA  
GGGTGGCGGTTCTGAGGGTGGCGGTTCTGAGGGTGGCGGTTACTAAACCTCCTGAGTACGGTGATA  
CACCTATTCCGGGCTATACTTATATCAACCCTCTCGACGGCACTTATCCGCCTGGTACTGAGCAAAA  
CCCCGCTAATCCTAATCCTTCTCTTGAGGAGTCTCAGCCTCTTAATACTTTTCATGTTTCAGAATAATAG  
GTTCCGAAATAGGCAGGGGGCATTAACTGTTTATACGGGCACTGTTACTCAAGGC**ACT**GACCCCGTT  
AAAACCTAT**TAC**CAGTACACTCCTGTATCATCAAAGCCATGTATGACGCTTACTGGAACGGTAAATT  
CAGAGACTGCGCTTTCCATTCTGGCTTTAATGAGGATCCATTCGTTTGTGAATATCAAGGCCAATCGT  
CTGACCTGCCTCAACCTCCTGTCAATGCTGGCGGCGGCTCTGGTGGTGGTTCTGGTGGCGGCTCTG  
AGGGTGGTGGCTCTGAGGGTGGCGGTTCTGAGGGTGGCGGCTCTGAGGGAGGCGGTTCCGGTGG  
TGGCTCTGGTTCCGGTGATTTTGATTATGAAAAGATGGCAAACGCTAATAAGGGGGCTATGACCGAA  
AATGCCGATGAAAACGCGCTACAGTCTGACGCTAAAGGCAAACCTTGATTCTGTCGCTACTGATTACG  
GTGCTGCTATCGATGGTTTCATTGGTGACGTTTCCGGCCTTGCTAATGGTAATGGTGCTACTGGTGA  
TTTTGCTGGCTCTAATCCCAAATGGCTCAAGTCGGTGACGGTGATAATTCACCTTTAATGAATAATTT  
CCGTCAATATTTACCTTCCCTCCCTCAATCGGTTGAATGTCGCCCTTTTGTCTTTGGCGCTGGTAAAC  
CTTACGAGTTTCAAGTATCGACTGCGATAAGATCAACCTGTTCCGGCGGTGTCTTTGCGTTTCTTTTATAT  
GTTGCCACCTTTATGTATGTATTTTCTACGTTTGCTAACATACTGCGTAATAAGGAGTCTTAA



r. DNA sequence of **luxAB(Y361TAG)**. The in-frame amber stop codon is highlighted in yellow.

ATGAAATTTGGAAACTTTTTGCTTACATACCAACCTCCCCAATTTTCCCAAACAGAGGTAATGAAACGT  
TTGGTTAAATTAGGTTCGCATCTCTGAGGAGTGTGGTTTTGATACCGTATGGTTACTGGAGCATCATT  
CACGGAGTTTGGTTTGGTTGGTAACCCTTATGTCGCTGCTGCATATTTACTTGGCGCGACTAAAAAT  
TGAATGTAGGAACTGCCGCTATTGTTCTTCCACAGCCCATCCAGTACGCCAACTTGAAGATGTGAA  
TTTATTGGATCAAATGTCAAAAAGGACGATTTCCGTTTTGGTATTTGCCGAGGGCTTTACAACAAGGACT  
TTCGCGTATTCGGCACAGATATGAATAACAGTTCGCGCCTTAGCGGAATGCTGGTACGGGCTGATAAA  
GAATGGCATGACAGAGGGATATATGGAAGCTGATAATGAACATATCAAGTTCCATAAGGTAAAAGTAA  
ACCCCGCGGCGTATAGCAGAGGTGGCGCACCGGTTTATGTGGTGGCTGAATCAGCTTCGACGACTG  
AGTGGGCTGCTCAATTTGGCTACCGATGATATTAAGTTGGATTATAAATACTAACGAAAAGAAAGCA  
CAACTTGAGCTTTATAATGAAGTGGCTCAAGAATATGGGCACGATATTCATAATATCGACCATTGCTT  
ATCATATATAACATCTGTAGATCATGACTCAATTAAGCGAAAGAGATTTGCCGGAAATTTCTGGGGC  
ATTGGTATGATTCTTATGTGAATGCTACGACTATTTTTGATGATTCAGACCAAACAAGAGGTTATGATT  
TCAATAAAGGGCAGTGGCGTGACTTTGTATTAAGGACATAAAGATACTAATCGCCGATTGATTAC  
AGTTACGAAATCAATCCCGTGGGAACGCCGAGGAATGTATTGACATAATTCAAAAGACATTGATG  
CTACAGGAATATCAAAATTTTGTGGATTTGAAGCTAATGGAACAGTAGACGAAAATTATTGCTTCC  
ATGAAGCTCTCCAGTCTGATGTCATGCCATTTCTTAAAGAAAAACAACGTTTCGCTATTATATTAGGG  
CGGTGGCGGTAGCGGCGGTGGCGGTAGCGGCGGTGGCGGTAGCGGCGGTGGCGGTAGCAAATTT  
GGATTGTTCTTCTTAACCTTCATCAATTCAACAACCTGTTCAAGAACAGAGTATAGTTCGCATGCAGGA  
AATAACGGAGTATGTTGATAAGTTGAATTTGAACAGATTTTAGTGTATGAAAATCATTTTTCAGATAA  
TGGTGTTCGCGGCTCCTCTGACTGTTTCTGGTTTTCTGCTCGGTTTAAACAGAGAAAATTAATTAATG  
GTTCAATTAATCACATCATTACAACCTCATCATCCTGTCCGCATAGCGGAGGAAGCTTGCTTATTGGAT  
CAGTTAAGTGAAGGGAGATTTATTTTAGGGTTTAGTGTATGCGAAAAAAAAGATGAAATGCATTTTTTT  
AATCGCCCGGTTGAATATCAACAGCAACTATTTGAAGAGTGTTATGAAATCATTAAACGATGCTTTAAC  
AACAGGCTATTGTAATCCAGATAACGATTTTTATAGCTTCCCTAAAATATCTGTAAATCCCCATGCTTA  
TACGCCAGGCGGACCTCGGAAATATGTAACAGCAACCAGTCATCATATTGTTGAGTGGGCGGCCAA  
AAAAGGTATTCCTCTCATCTTTAAGTGGGATGATTCTAATGATGTTAGATATGAATATGCTGAAAGATA  
TAAAGCCGTTGCGGATAAATATGACGTTGACCTATCAGAGATAGACCATCAGTTAATGATATTAGTTA  
ACTATAACGAAGATAGTAATAAAGCTAAACAAGAGACGCGTGCAATTTATTAGTGATTATGTTCTTGAAA  
TGCACCCTAATGAAAATTTGAAAATAAACTTGAAGAAATAATTGCAGAAAACGCTGTCCGAAATTAT  
ACGGAGTGTATAACTGCGGCTAAGTTGGCAATTGAAAAGTGTGGTGCGAAAAGTGTATTGCTGTCCCT  
TTGAACCAATGAATGATTTGATGAGCCAAAAAATGTAATCAATATTGTTGATGATAATATTAAGAAGT  
ACCACACGGAATATACCTAA

s. DNA sequence of **wt sfGFP** expressed from **pET28b(+)-sfGFP**. Codons Asn-39, which was mutated to an amber stop codon in the course of characterizing *Mj*TyrRS variants, is highlighted yellow.

```
ATGAGCAAGGGCGAAGAAGTGTACGGGGCGTGGTGCCGATTCTGGTGGAAGTGGATGGTGATGTC
AATGGTCACAAATTCAGCGTGC GCGGCGAAGGTGAAGGCGATGCAACC AATGGTAAACTGACGCTG
AAGTTTATTTGCACCACGGGTAAACTGCCGGTTCCTGGCCGACCCTGGTCACCACGCTGACGTAT
GGTGTTTCAGTGTTTCAGTCGTTACCCGGATCACATGAAACGCCACGACTTTTTCAAGTCCGCGATGC
CGGAAGGTTATGTCCAAGAACGTACCATCTCATTTAAAGATGACGGCACCTACAAAACGCGCGCCGA
AGTGAAATTCGAAGGTGATACGCTGGTTAACCGTATTGAACTGAAAGGCATCGATTTTAAGGAAGAC
GGTAATATTCTGGGCCATAAACTGGAATATAACTTCAATTTCGCACAACGTGTACATCACCGCAGATAA
GCAGAAGAACGGTATCAAGGCTAACTTCAAGATCCGCCATAATGTGGAAGATGGCAGCGTTCAACTG
GCCGACCACTATCAGCAAAACACCCCGATTGGTGATGGCCCGGTCCTGCTGCCGGACAATCATTAC
CTGAGCACGCAGTCTGTGCTGAGTAAAGATCCGAACGAAAAGCGTGACCACATGGTCCTGCTGGAA
TTCGTGACCGCGGCCGGCATCACGCACGGTATGGACGAACTGTATAAAGGCTCACTCGAGCACCAC
CACCACCACACTGA
```

t. DNA sequence of **wt sfGFP** expressed from **pBAD-sfGFP**. Codons that were mutated to amber stop codons in the course of characterizing *Py*IRS variants are highlighted in yellow (Ser-2, Asn-39, Asn-135, and Tyr-151).

```
ATG AGCAAGGGCGAAGAAGTGTACGGGGCGTGGTGCCGATTCTGGTGGAAGTGGATGGTGATGTC
AATGGTCACAAATTCAGCGTGC GCGGCGAAGGTGAAGGCGATGCAACC AATGGTAAACTGACGCTG
AAGTTTATTTGCACCACGGGTAAACTGCCGGTTCCTGGCCGACCCTGGTCACCACGCTGACGTAT
GGTGTTTCAGTGTTTCAGTCGTTACCCGGATCACATGAAACGCCACGACTTTTTCAAGTCCGCGATGC
CGGAAGGTTATGTCCAAGAACGTACCATCTCATTTAAAGATGACGGCACCTACAAAACGCGCGCCGA
AGTGAAATTCGAAGGTGATACGCTGGTTAACCGTATTGAACTGAAAGGCATCGATTTTAAGGAAGAC
GGT AATATTCTGGGCCATAAACTGGAATATAACTTCAATTTCGCACAACGTG TACATCACCGCAGATAA
GCAGAAGAACGGTATCAAGGCTAACTTCAAGATCCGCCATAATGTGGAAGATGGCAGCGTTCAACTG
GCCGACCACTATCAGCAAAACACCCCGATTGGTGATGGCCCGGTCCTGCTGCCGGACAATCATTAC
CTGAGCACGCAGTCTGTGCTGAGTAAAGATCCGAACGAAAAGCGTGACCACATGGTCCTGCTGGAA
TTCGTGACCGCGGCCGGCATCACGCACGGTATGGACGAACTGTATAAAGGCTCACATCATCATCATC
ATCATTGA
```

## Supplementary References

1. Davis, J.H., Rubin, A.J. & Sauer, R.T. Design, construction and characterization of a set of insulated bacterial promoters. *Nucleic Acids Res.* **39**, 1131-1141 (2011).
2. Ringquist, S. *et al.* Translation initiation in *Escherichia coli*: sequences within the ribosome-binding site. *Mol. Microbiol.* **6**, 1219-1229 (1992).
